# Supplementary material for: Rapid flow-through fractionation of biomass to preserve labile aryl ether bonds in native lignin
Source: Royal Society of Chemistry journal article supplement (doi:10.1039/c9gc02315a), 2019-01-01
Supplement: c9gc02315a1.pdf [file c9gc02315a1.pdf]

# Rapid Flow-Through Fractionation of Biomass to Preserve Labile Aryl Ether Bonds in Native Lignin

Hao Zhou,<sup>[a]</sup> Jia Yun Xu,<sup>[a]</sup> Yingjuan Fu,<sup>[a]</sup> Haiguang Zhang,<sup>[a]</sup> Zaiwu Yuan,<sup>[a]</sup> Menghua Qin,<sup>\*,[b]</sup> Zhaojiang Wang<sup>\*,[a]</sup>

<sup>a</sup> State Key Laboratory of Biobased Material and Green Papermaking, Qilu University of Technology, Shandong Academy of Sciences, Jinan 250353, China

<sup>b</sup> Laboratory of Organic Chemistry, Taishan University, Taian 271021, China

## Table of content

|                                                                                                                     |    |
|---------------------------------------------------------------------------------------------------------------------|----|
| Materials .....                                                                                                     | 3  |
| Gas chromatography-mass spectrometric (GC-MS) analysis and the quantification of lignin monomers.....               | 3  |
| Ultra-performance liquid chromatography tandem mass spectrometry (LC-MS) analysis.....                              | 4  |
| Determination of structural carbohydrates and lignin in untreated biomass and solid residue after treatments.....   | 4  |
| NMR analysis .....                                                                                                  | 5  |
| GPC analysis .....                                                                                                  | 6  |
| Schematic illustration of the Flow-through Fractionation(Figure S1) .....                                           | 7  |
| HSQC spectra of the MWL of untreated wheat straw, and lignins from RFF fractionation(Figure S2) .....               | 8  |
| Fractionated products from RFF at various treatment conditions(Figure S3).....                                      | 9  |
| GPC Elution profile of degradation products of GG at different time(Figure S4).....                                 | 10 |
| GC-MS identification of the low molecular weight products of GG reaction(Figure S5).....                            | 11 |
| LC-MS identification of the GG reaction products(Figure S6) .....                                                   | 16 |
| Possible mechanism of reduction reaction and oxidation reaction(Figure S7).....                                     | 19 |
| Comparison of mass spectrum between the actually-obtained and the spectroscopy library(Figure S8).....              | 20 |
| Mass spectrum of C6C3 enol-ether (EE)( Figure S9).....                                                              | 27 |
| Mass spectrum of formylated enol-ether (formylated EE)( Figure S10) .....                                           | 28 |
| Yields of monomeric products from GG degradation(Figure S11) .....                                                  | 29 |
| Assignment of Selected <sup>13</sup> C/ <sup>1</sup> H Chemical Shifts Observed in HSQC NMR Spectra(Table S1) ..... | 30 |

|                                                                                                             |    |
|-------------------------------------------------------------------------------------------------------------|----|
| Calculation of Various Lignin Moieties by 2D NMR(Table S2) .....                                            | 32 |
| Mass balances for RFF treatments of wheat straw and poplar wood(Table S3 and Table S4) .....                | 33 |
| Peaks assignment of 2D <sup>13</sup> C/ <sup>1</sup> H HSQC NMR of GG degradation products (Table S5) ..... | 34 |
| Literatures .....                                                                                           | 35 |

## Materials

Wheat straw was harvested from a suburb farm located at southwest of Jinan, Shandong province, China. Wheat straw was air dried and cut into lengths of 1-6 mm prior fractionation. The primary chemical compositions of the wheat straw were: cellulose 39.47%, hemicelluloses 25.31% (arabinan 2.57%, galactan 0.50%, xylan 22.24%), acid insoluble lignin 22.12%, and acid-soluble lignin 3.07%, toluene-ethanol extractives 3.21%, and ash 6.57%, according to the technical report NREL/TP-510-42623. Poplar wood logs were chipped manually to thickness of 1–5 mm. Wood chips were soaked in water at room temperature for 12 hours and then grounded to fibres using a high consistency pulp-refiner (KRK 2500-II, Kumagai Riki Kogyo, Japan) with disk patterns of D2B505 and a disk-gap of 1.0 mm. The wood fibres slurry was dewatered to a solid content of about 35% by squeezing and then stored in a plastic bag at 4 °C for further use. The wood fibres were chemically composed of 38.8% cellulose, 18.2% hemicellulose (0.64% arabinan, 0.92% galactan, 14.5% xylan, and 2.24% mannan), 27.8% acid insoluble lignin, and 3.16% acid soluble lignin. Milled wood lignin (MWL) of poplar wood and wheat straw was obtained according to the classical method from extractive-free biomass.<sup>[1]</sup> Formic acid was (ACS reagent grade), phenol, 2-methoxy-4-propyl- (PMP) and 2,4'- dihydroxy -3'-methoxyacetophenone (DMP) were purchased from Sigma-Aldrich (Saint Louis, MO, USA). Guaiacylglycerol- $\beta$ -guaiacyl ether (GG), phenol, 2-methoxy- (GOH) and vanillin (VAN) were purchased from Aladdin Bio-Chem Technology (Shanghai, China). All of the other chemicals were of analytical grade and used as supplied.

## Gas chromatography-mass spectrometric (GC-MS) analysis and the quantification of lignin monomers

GC-MS analysis was performed on an Agilent Technologies 7890A gas chromatograph equipped with a 5975C inert MSD/DS Turbo Electron Impact mass spectrometer employing a HP-5MS column (30 m x 0.25 mm x film thickness 0.25  $\mu$ m, Agilent Technologies). Temperature program as follows: 50°C for 3 min; ramp to 100°C at 5°C/min and hold for 5min; ramp to 280°C at 50°C /min and hold for 4 min, total run time:

25.6 min. Standard compounds from commercial purchase were used to make calibration curves for the quantification of GG, GOH, VAN, PMP and DMP by GC-MS. BDME and PHHM were not commercially available, and quantified by using the calibration curve of VAN.

### **Ultra-performance liquid chromatography tandem mass spectrometry (LC-MS) analysis**

LC-MS quantitation of depolymerization products was performed via gradient elution from an Ascentis Express C18 column (150 mm x 2.1 mm x 2.7  $\mu$ m particle size, Supelco, Bellefonte, PA) followed by integration of extracted ion chromatograms of [M-H]<sup>-</sup> ions. A quadrupole-Orbitrap hybrid mass spectrometer (Q Exactive, Thermo Scientific, San Jose, CA) equipped with a heated electrospray source (HESI II Probe, Thermo Scientific) and a photodiode array UV detector (Accela PDA Detector, Thermo Scientific) were used to detect analytes. The system was fitted with an autosampler that kept samples at 4 °C prior to injection (Thermo PAL, Thermo Scientific). Mobile phase A consisted of water with 0.1% formic acid adjusted to pH 3 with ammonia and B was acetonitrile. The gradient program at 0.4 mL/min flow rate and ambient temperature was: 10% B for 1 min, to 20% B over 14 min, to 70% B over 5 min, and held there for 5 min before immediately returning to initial conditions and re-equilibrating for 4 min. The mass spectrometer was operated in fast polarity switching mode, acquiring full scan (85 – 500 Th, R = 17,500, AGC Target = 5e5, max. injection times = 50 ms (+), 75 ms (-), centroid acquisition, S-lens = 50, and inlet = 320 °C) mass spectra in positive and negative ion mode during the same chromatographic run. The source conditions were as follows: Source heater at 350 °C and 60 and 15 units each of sheath and auxiliary gas. The UV detector acquired spectra (190–500 nm) at 5 Hz in addition to absorbance traces at 254, 280, and 322 nm. Filter bandwidth and wavelength step were 1 nm each for acquisition of spectra and filter bandwidth was 9 nm for single wavelength UV trace acquisition. Filter rise time was set to 0.2 s.

### **Determination of structural carbohydrates and lignin in untreated biomass and solid residue after treatments**

The structural carbohydrates and lignin in untreated biomass and the solid residue after treatment were determined according to technical

report NREL/TP-510-42618.<sup>[2]</sup> Saccharides and degradation products in liquid extract were determined according to technical report NREL/TP-510-42623.<sup>[3]</sup> Monosaccharides were determined directly using a Dionex HPLC system (ICS-5000, Sunnyvale, CA) equipped with a GP40 gradient pump, an anion exchange column (CarboPac PA20 analytical column 3×150 mm and guard column 3×30 mm) and an ED40 electrochemical detector as described previously.<sup>[4]</sup> To determine the amount of oligosaccharides extracted, a posthydrolysis process of the extracted liquor was performed to break all the oligomers in monomers using 4% w/w of H<sub>2</sub>SO<sub>4</sub> at 120 °C for 60 min. The total lignin content in biomass was determined as a sum of acid insoluble lignin and acid-soluble lignin. The equation  $1 - L_{sr} \times Y_{sr}/L_{ub}$  was used for delignification value (lignin yield), where  $L_{sr}$  is lignin content in solid residue,  $Y_{sr}$  is yield of solid residue after treatment, and  $L_{ub}$  is lignin content in untreated biomass.

### NMR analysis

Dissolved lignin in extract was isolated as precipitates by 4 times dilution of extract using water, and then lyophilized at -55 °C for NMR analysis. 2D HSQC NMR of lignin was performed in a Bruker AVIII 400 MHz spectrometer according to published methods.<sup>[5]</sup> For 2D HSQC, lignin (60 mg) was placed into a 5 mm NMR tube and dissolved in 0.5 mL of DMSO-d<sub>6</sub>, referenced at 39.5/2.5 ppm. The <sup>13</sup>C-<sup>1</sup>H short range correlation experiment was performed using the Bruker standard pulse program hsqcedetgpsisp2.2 (phase sensitive, gradient-edited, sensitivity enhanced 2D-HSQC using adiabatic pulses for inversion and refocusing) using non-uniform sampling of 50%. Spectra were acquired using 40 scans and an interscan delay of 1s for a total acquisition time of 3 hours with a 12 ppm sweep width in F2 (<sup>1</sup>H) using 1024 data points for an acquisition time of 85 ms; and in F1 (<sup>13</sup>C), a 215 ppm sweep width using 512 increments for acquisition time of 9.74 ms. Data processing used squared cosine-bell in F1 and F2 resulting in a 1024 × 1024 data matrix. Topspin 3.7p17 was used for interactive integration of 2D cross-peaks.

## GPC analysis

The degradation products of GG at different time were estimated on a Waters Alliance Separations Module e2695 system equipped with three tandem 300 mm × 7.8 mm (L. × I.D.) Phenogel 5U columns (10000, 500, and 50 Å, respectively) and a 50 mm × 7.8 mm (L. × I.D.) Phenogel 5U guard column (Phenomenex, Torrance, CA). The eluent was an isocratic 100% THF (HPLC grade without a stabilizer) at a flow rate of 1.0 ml/min and the column temperature was maintained at 30 °C. Each sample in THF was injected after passing through a 0.45 µm filter and the fractionated lignin in the column eluent was detected using a variable wavelength detector (VWD) at 280 nm. The apparent molecular weight was calibrated using polystyrene standards and GG at 254 nm.

### Schematic illustration of the Flow-through Fractionation(Figure S1)

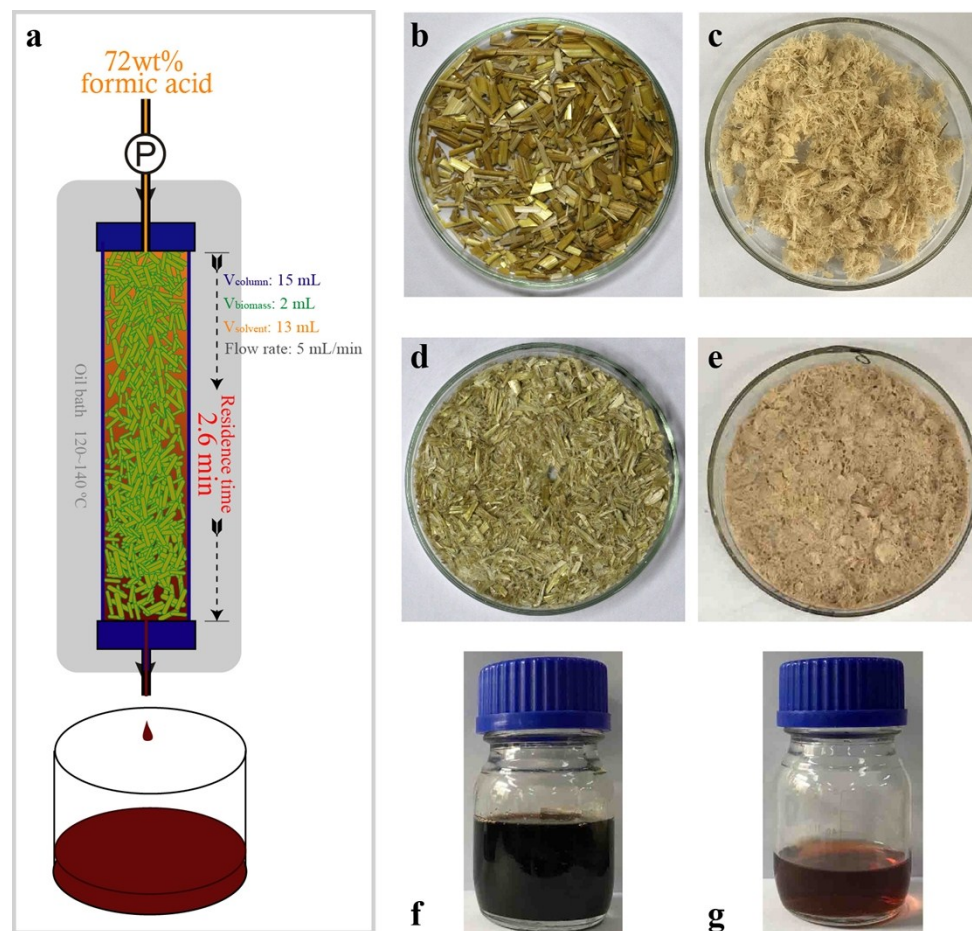

**Figure S1.** Rapid flow-through fractionation (RFF) of biomass using 72% aqueous formic acid. (a) configuration of flow-through reactor, untreated wheat straw and poplar wood fibers (b,c), cellulose-rich solid residue (d, e) and extract (f, g) from RFF treatment of wheat straw and poplar wood

## HSQC spectra of the MWL of untreated wheat straw, and lignins from RFF fractionation(Figure S2)

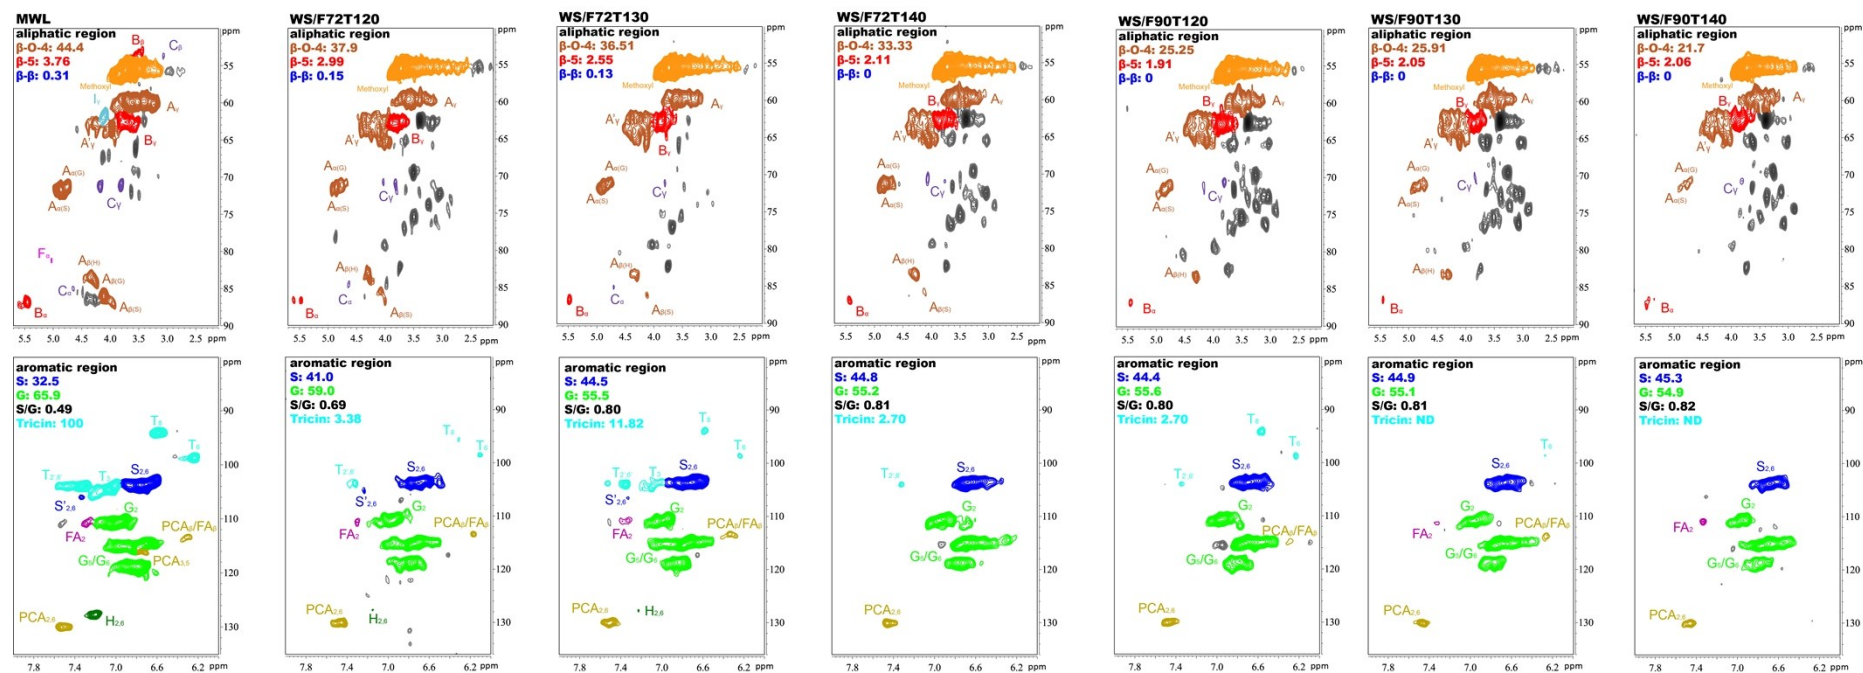

**Figure S2.** HSQC Spectra of the MWL of untreated wheat straw, and lignins from RFF fractionation

**Fractionated products from RFF at varoius treatment conditions(Figrue S3)**

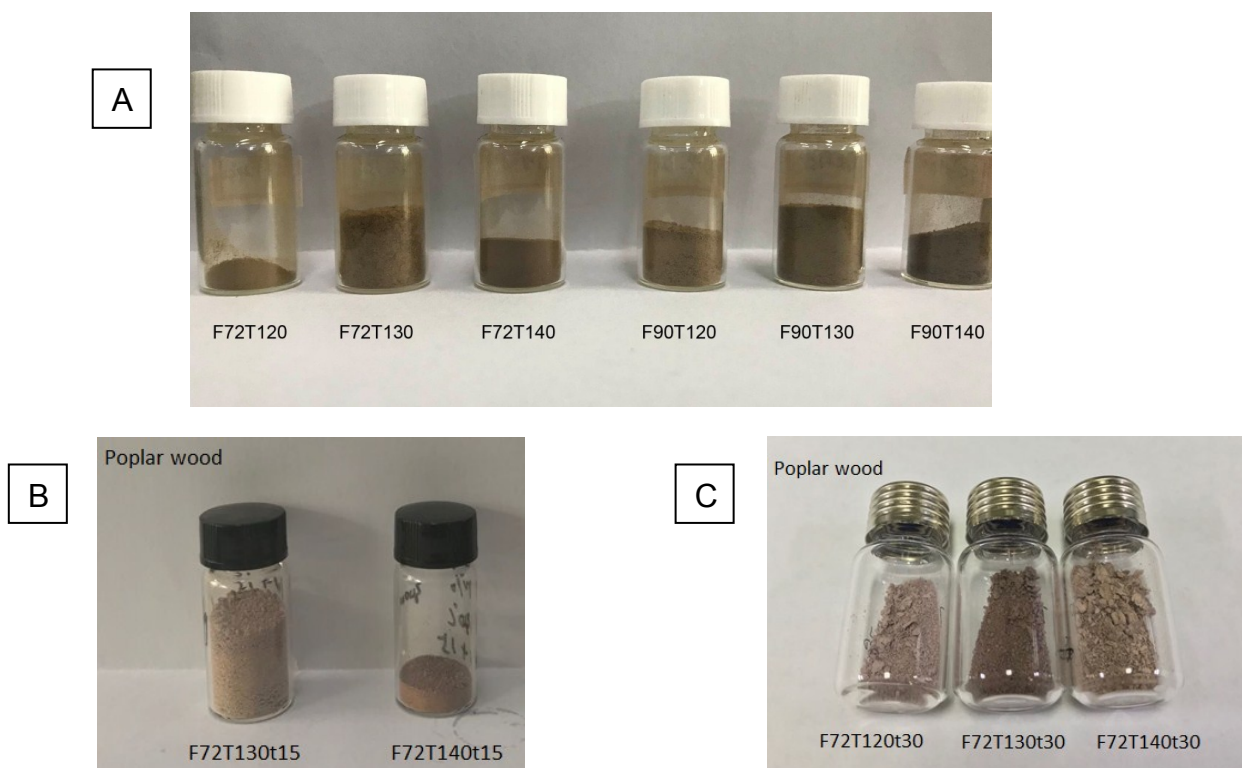

**Figure S3.** Fractionated products from RFF at various treatment conditions. (A) Water precipitated lignins from wheat straw effluents;(B,C) Water precipitated lignins from poplar wood effluents with different time.

**GPC Elution profile of degradation products of GG at different time(Figure S4)**

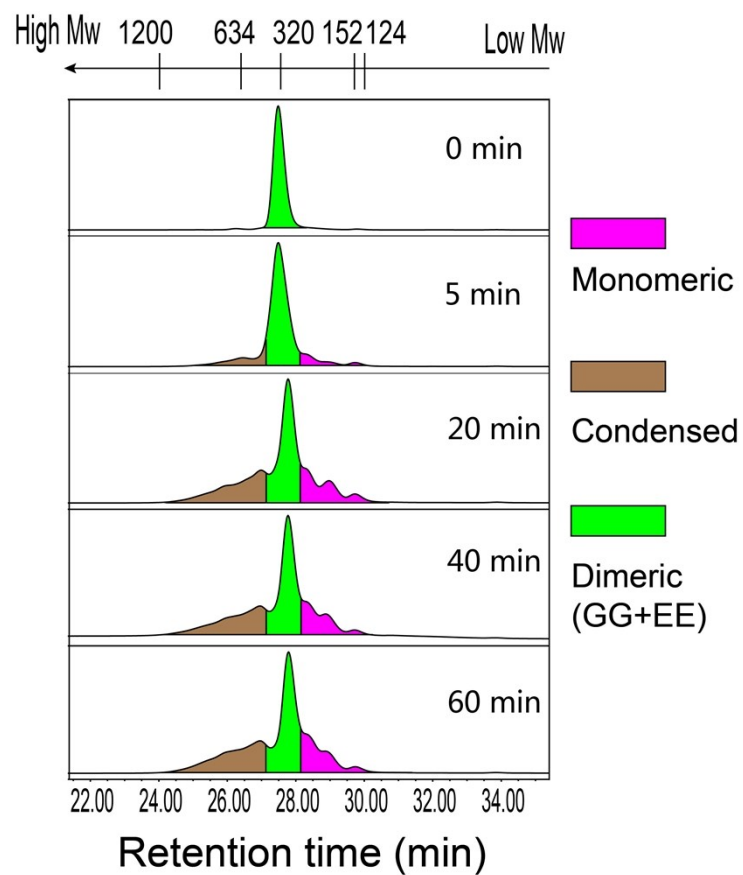

**Figure S4. GPC Elution profile of degradation products of GG at different time**

GC-MS identification of the low molecular weight products of GG reaction(Figure S5)

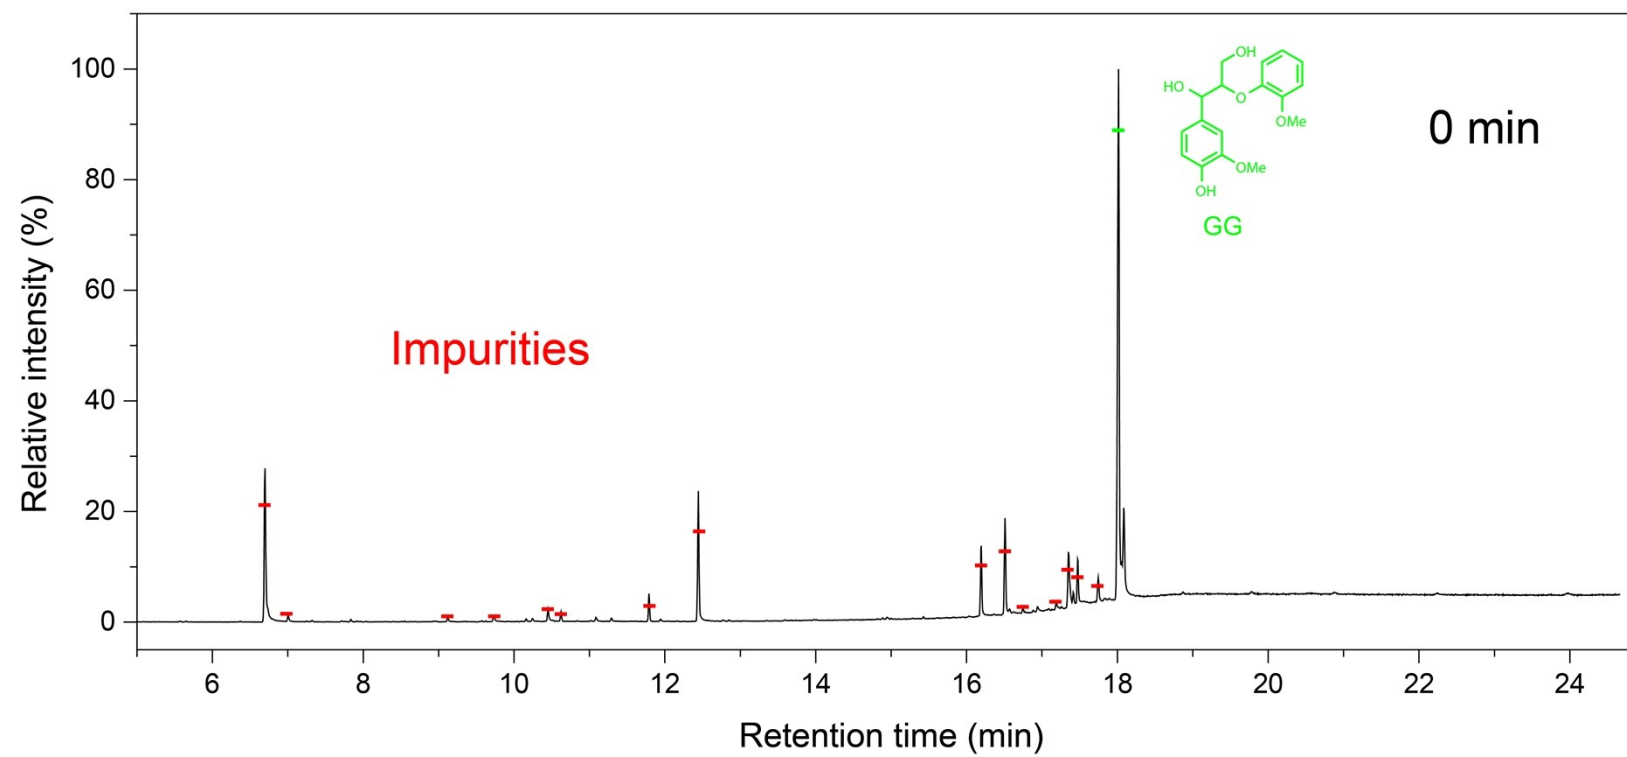

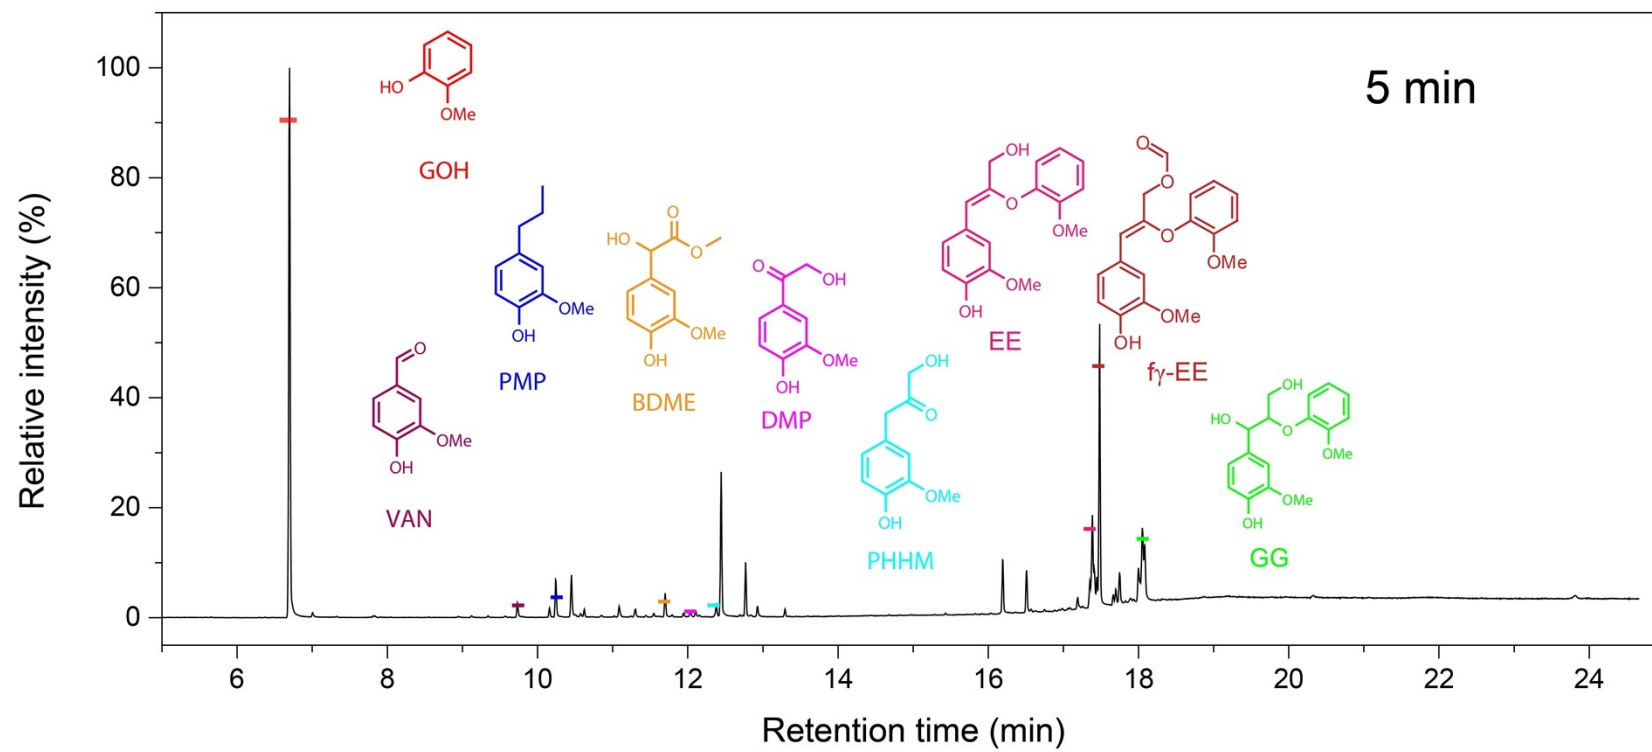

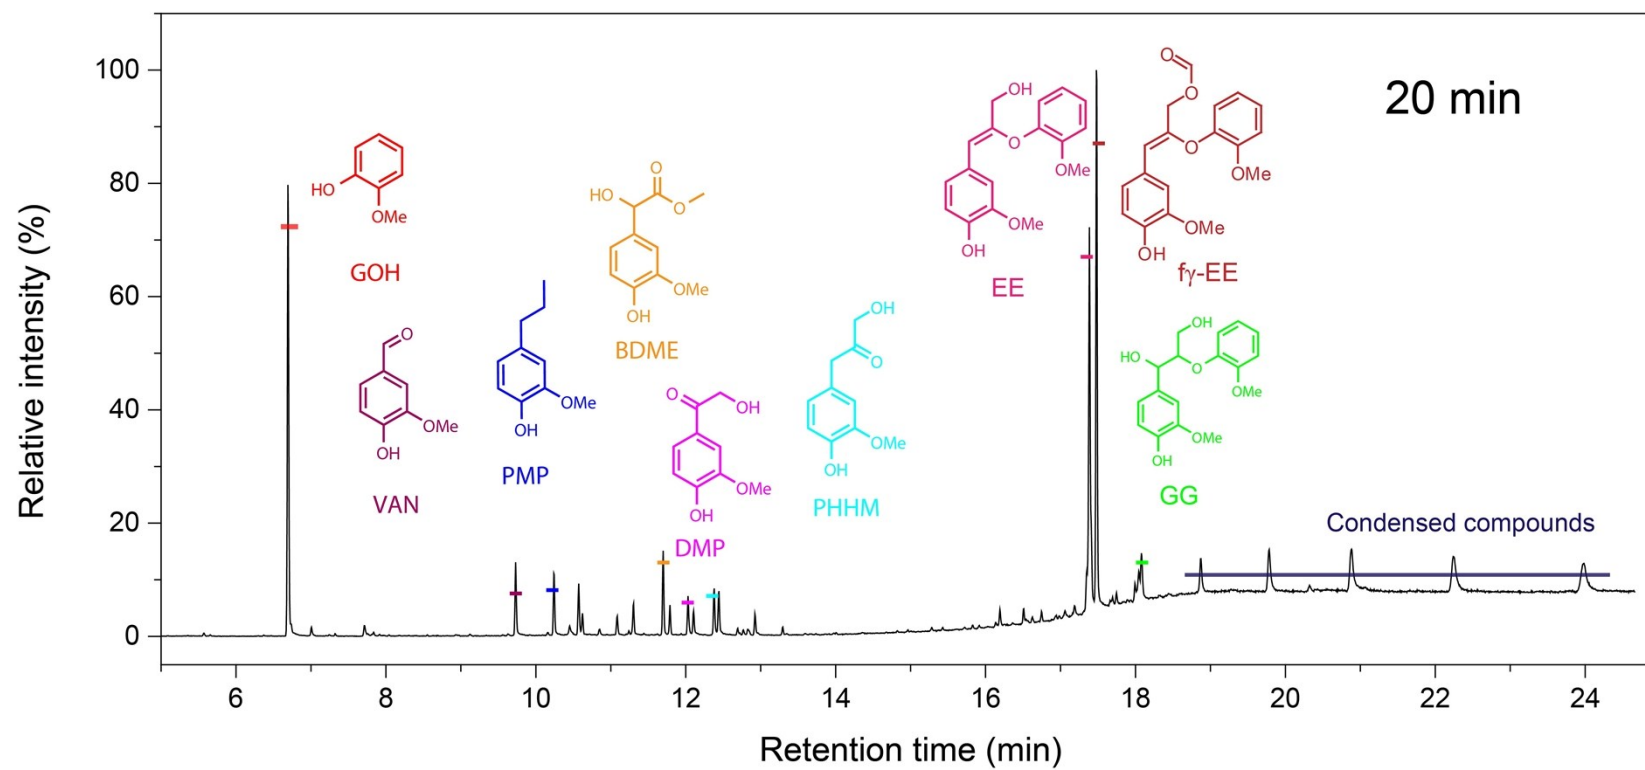

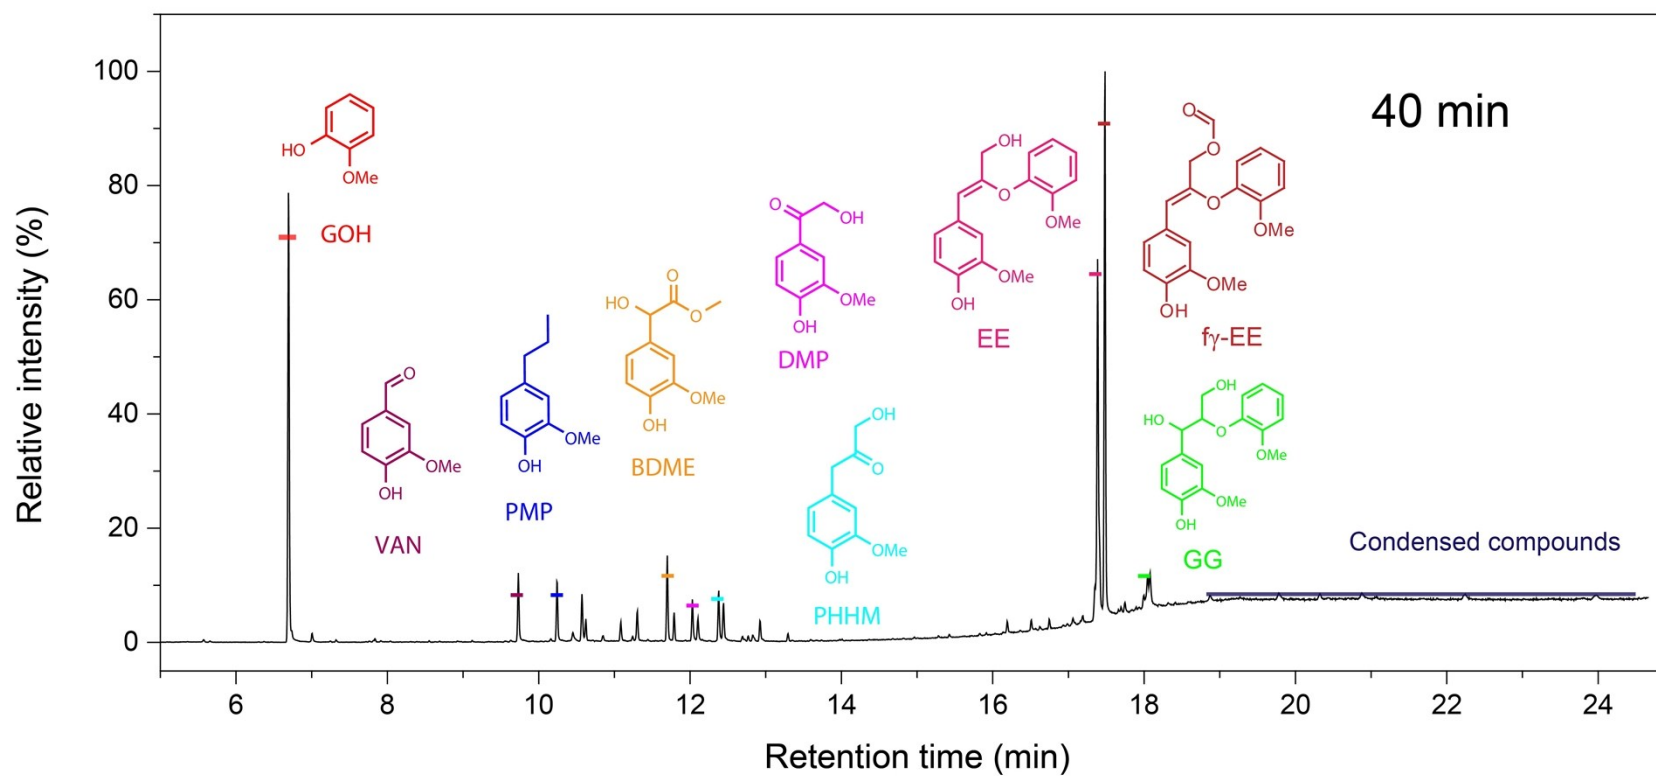

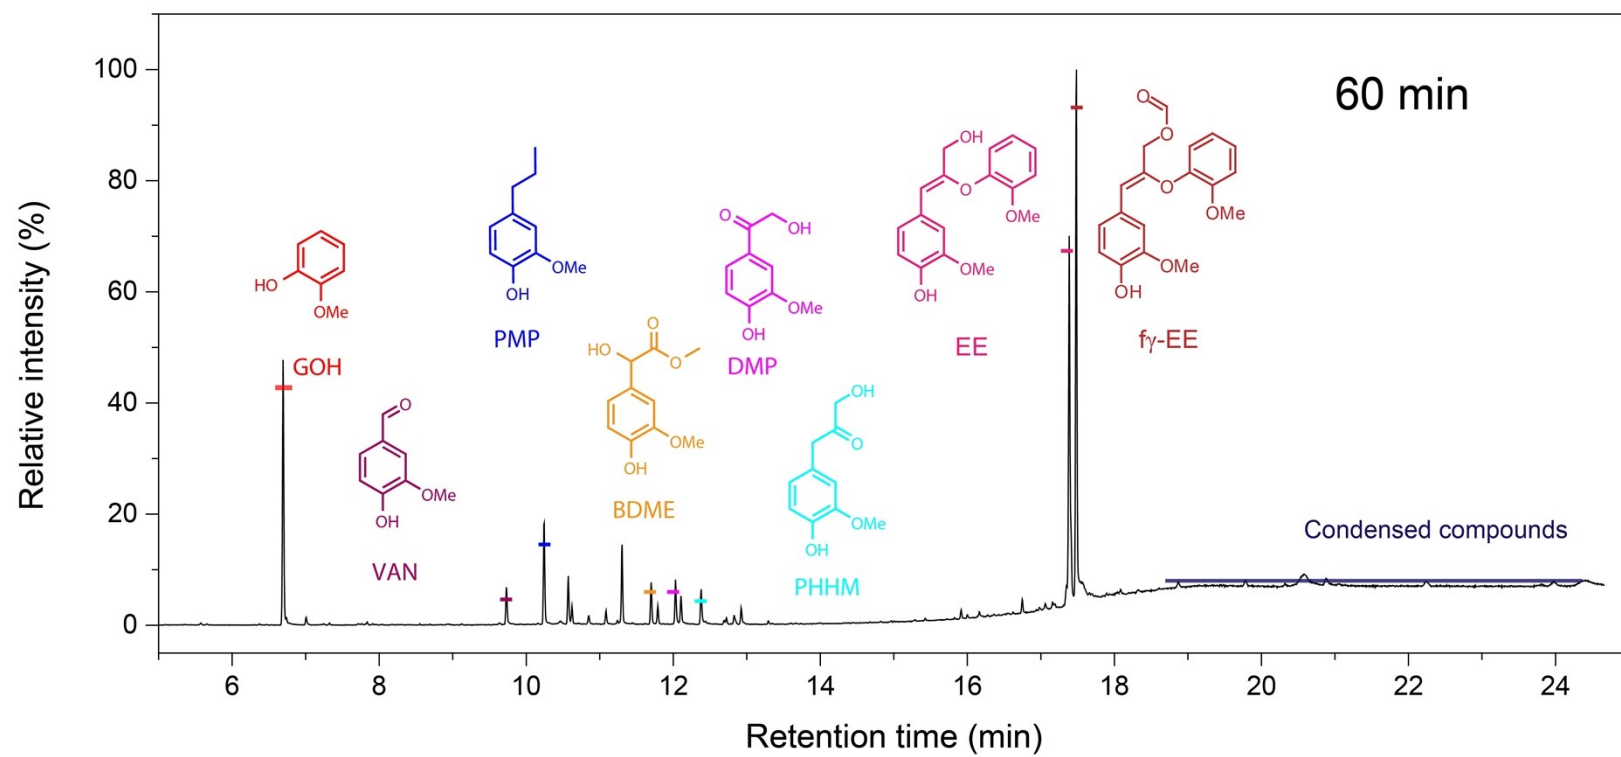

**Figure S5.** GC-MS identification of the low molecular weight products of GG reaction

## LC-MS identification of the GG reaction products(Figure S6)

A

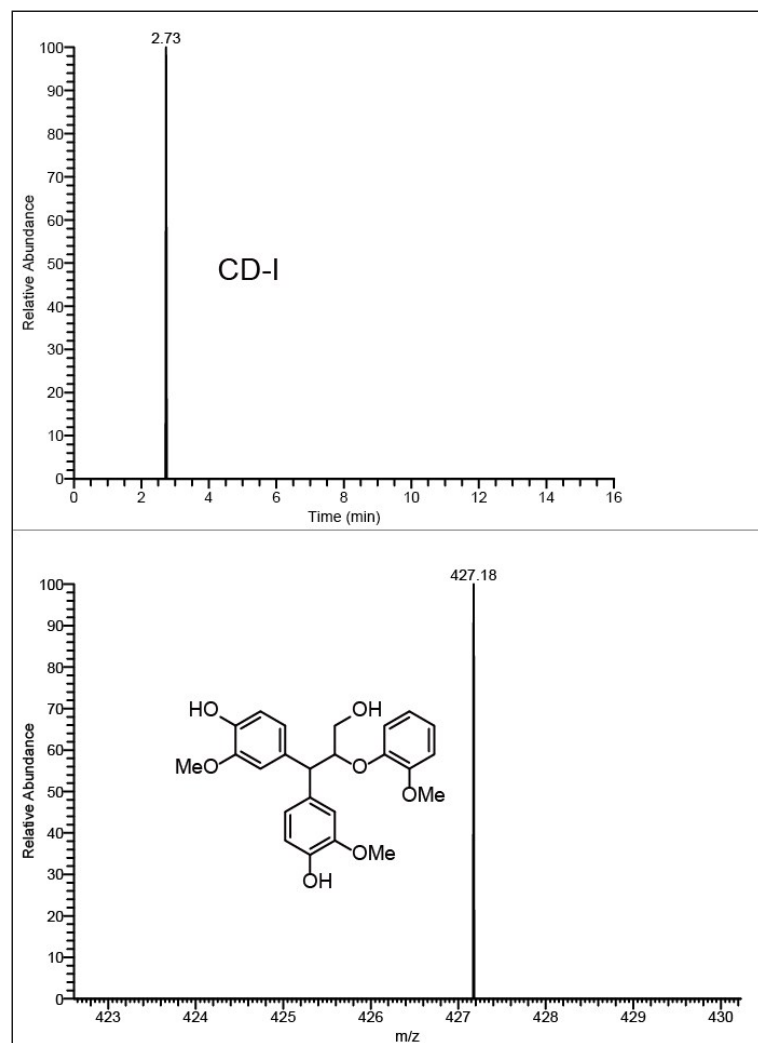

B

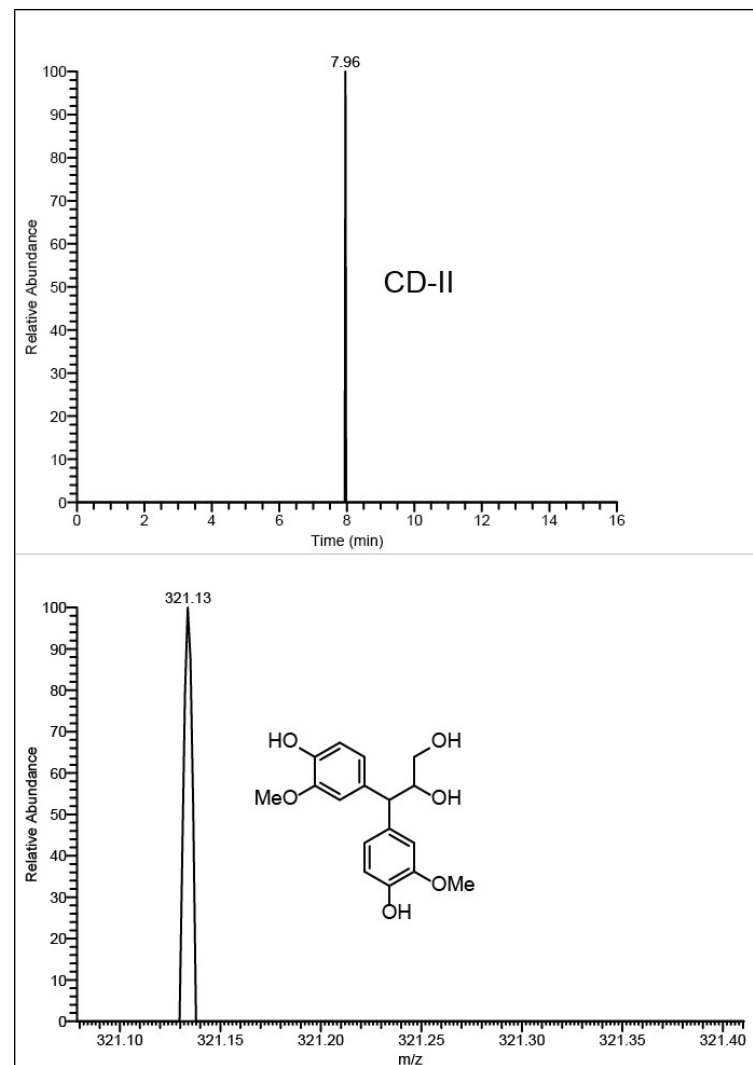

C

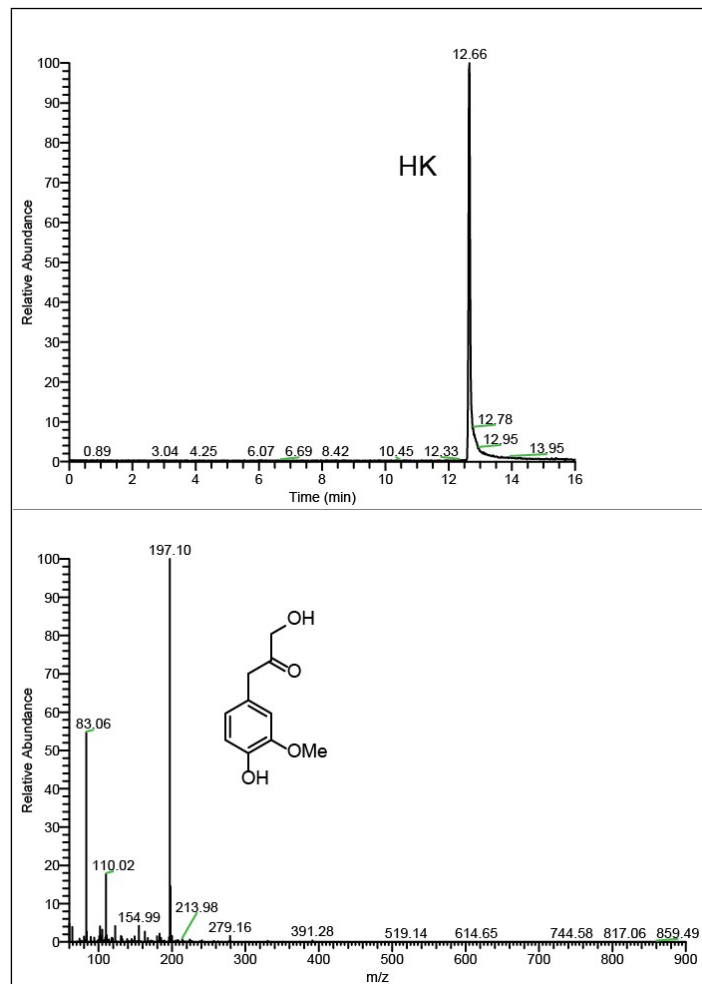

D

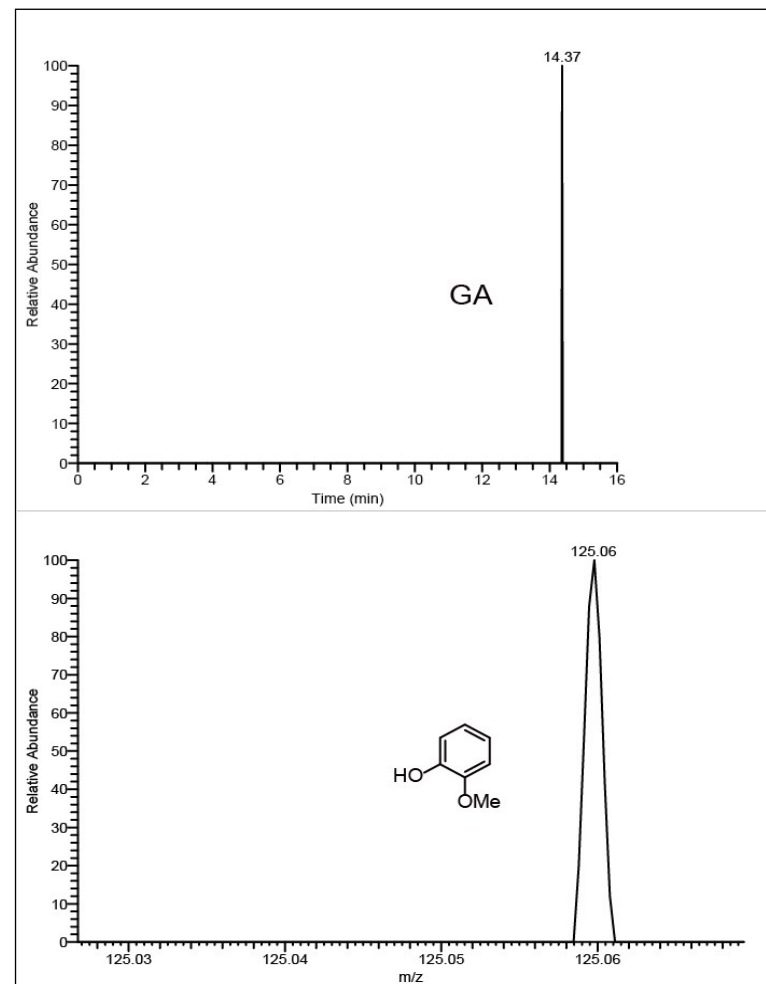

E

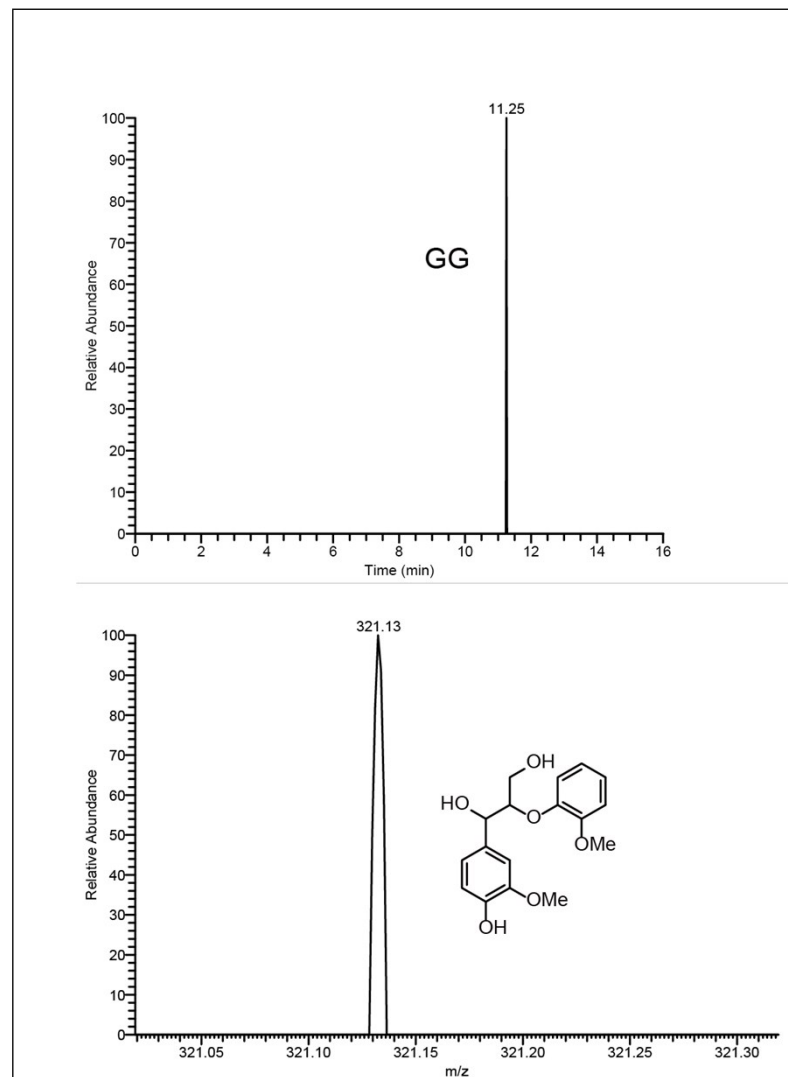

**Figure S6.** LC-MS identification of the GG reaction products at 130 °C with 72wt % aqueous formic acid for 20 min (A, B, C, D) and untreated GG (E).

## Possible mechanism of reduction reaction and oxidation reaction(Figure S7)

(a)

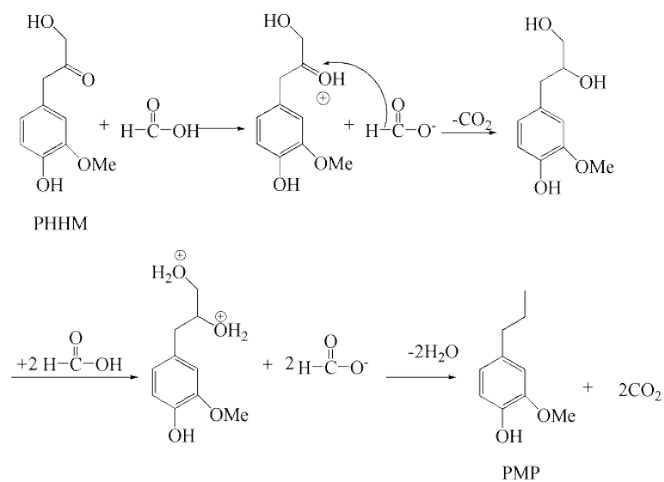

(b)

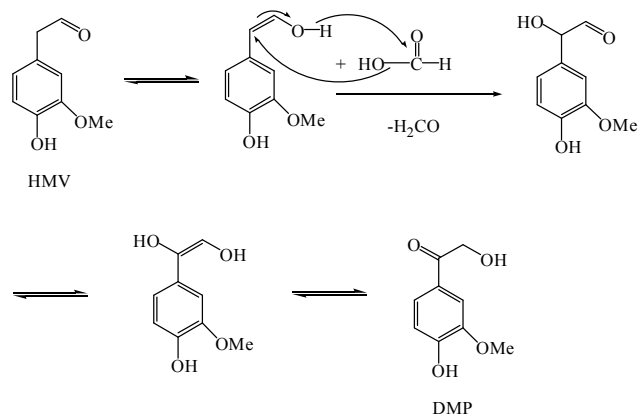

(c)

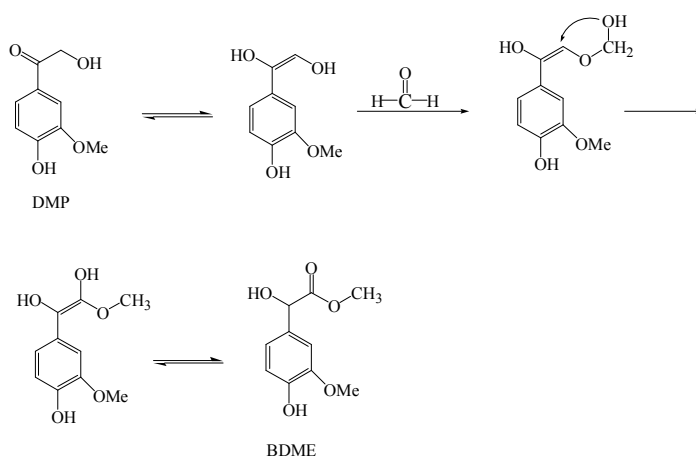

**Figure S7.** Possible mechanism of (a) reduction reaction of PHHM to PMP, (b) oxidation reaction of HMV to DMP, and (c) oxidation reaction of DMP to BDMP *via* treatment with formic acid

## Comparison of mass spectrum between the actually-obtained and the spectroscopy library(Figure S8)

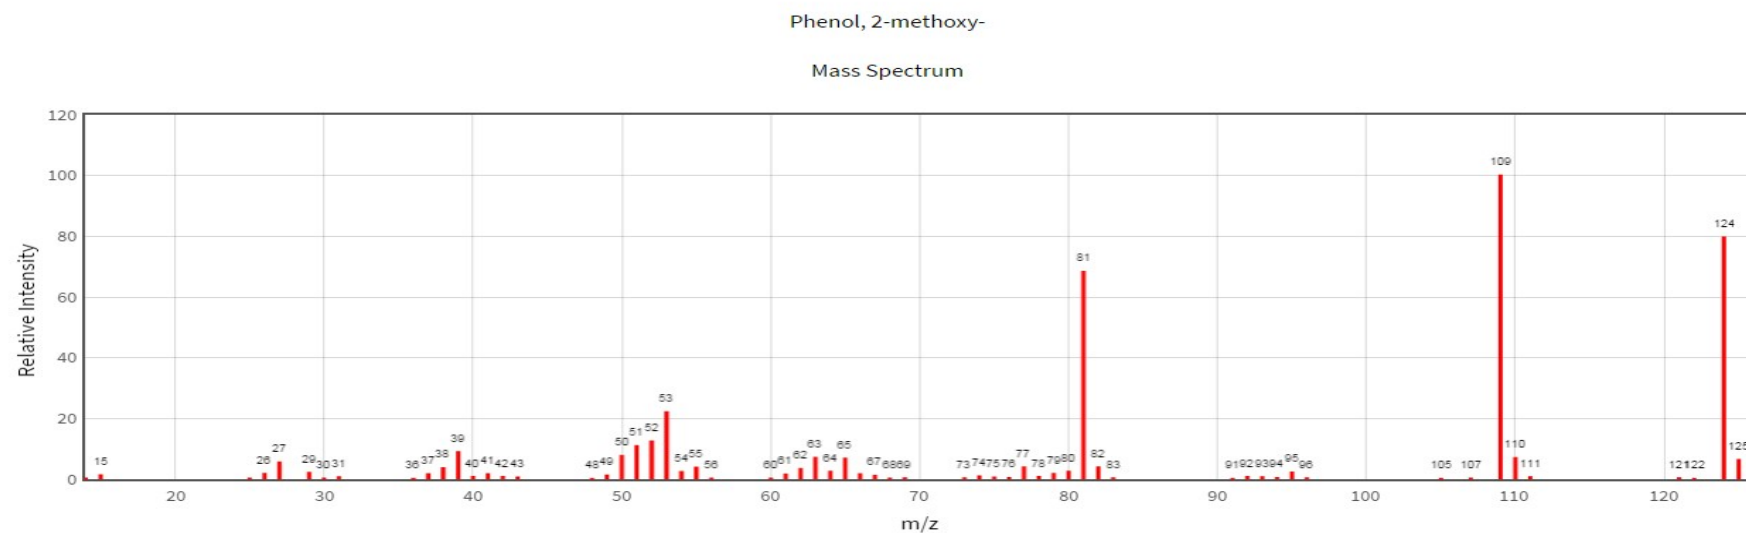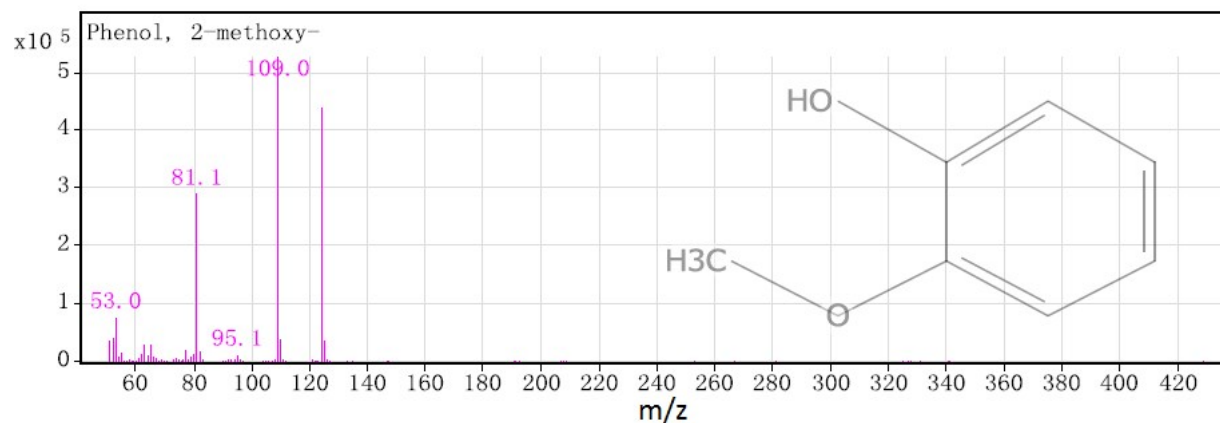

The mass spectrum of Phenol, 2-methoxy- (GOH) from NIST library (Top) and GC-MS (Bottom)  
 Compound CID: 460  
 CAS Registry Number: 90-05-1

Vanillin  
Mass Spectrum

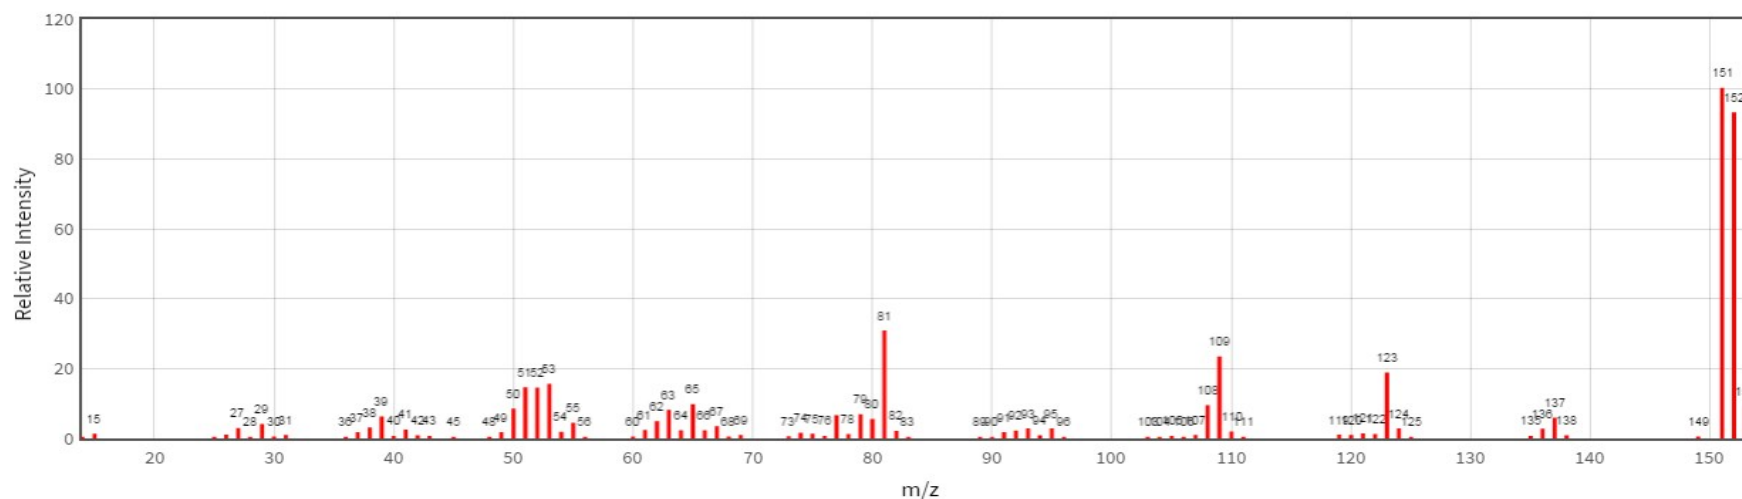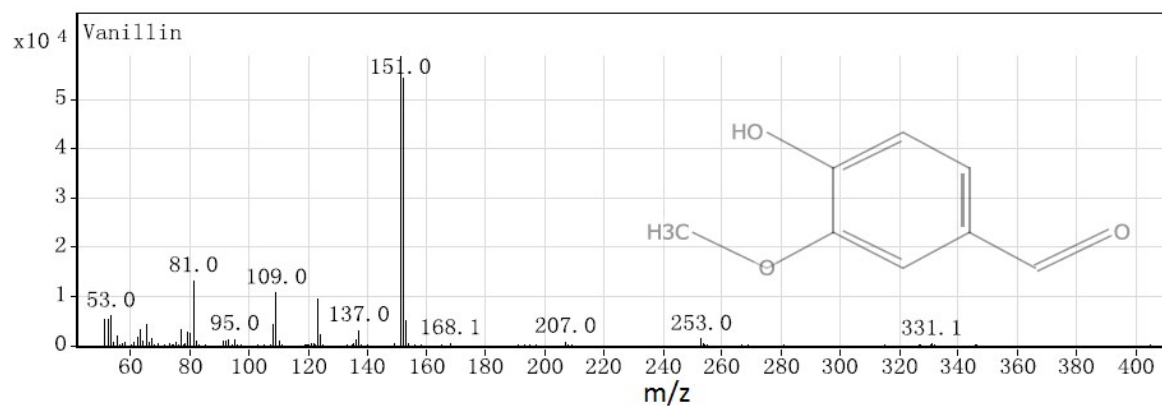

The mass spectrum of Vanillin  
(VAN) from NIST library (Top) and  
GC-MS (Bottom)  
Compound CID: 1183  
CAS Registry Number: 121-33-5

# Phenol, 2-methoxy-4-propyl-

## Mass Spectrum

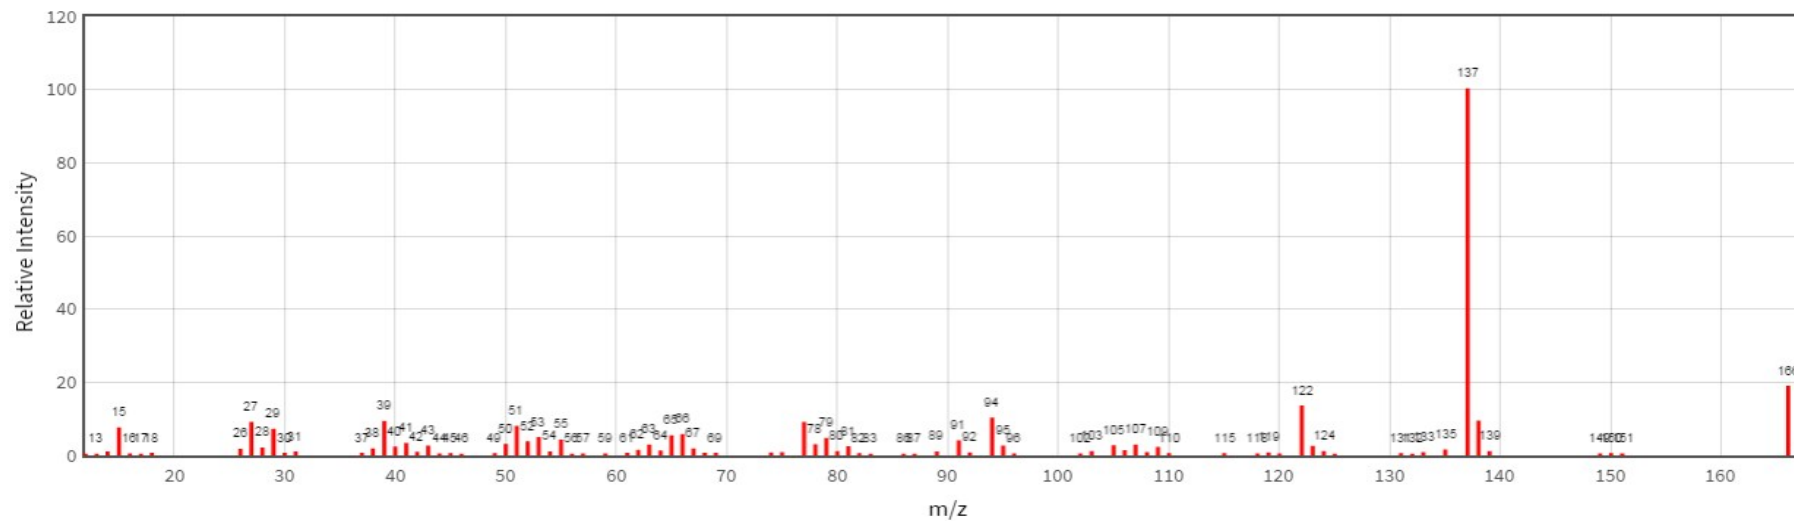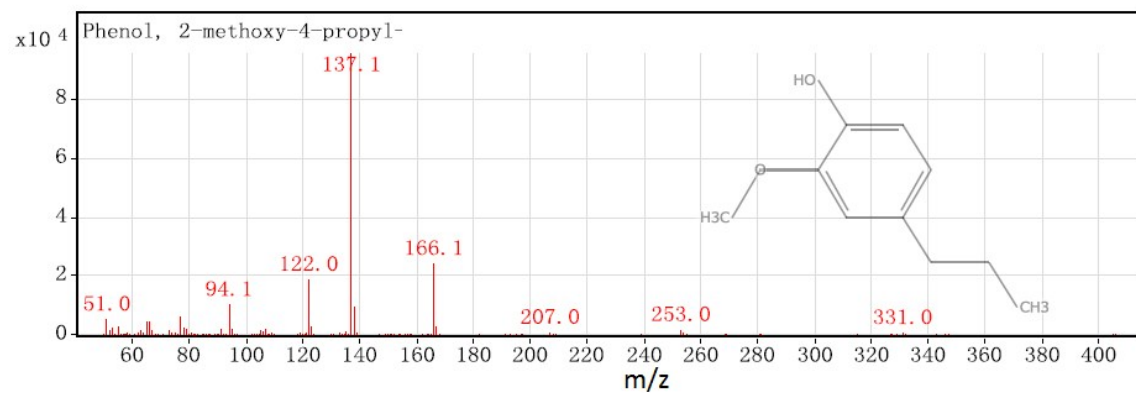

The mass spectrum of Phenol, 2-methoxy-4-propyl- (**PMP**) from NIST library (Top) and GC-MS (Bottom)

Compound CID: 17739

CAS Registry Number: 2785-87-7

Benzeneacetic acid, .alpha.,4-dihydroxy-3-methoxy-, methyl ester

Mass Spectrum

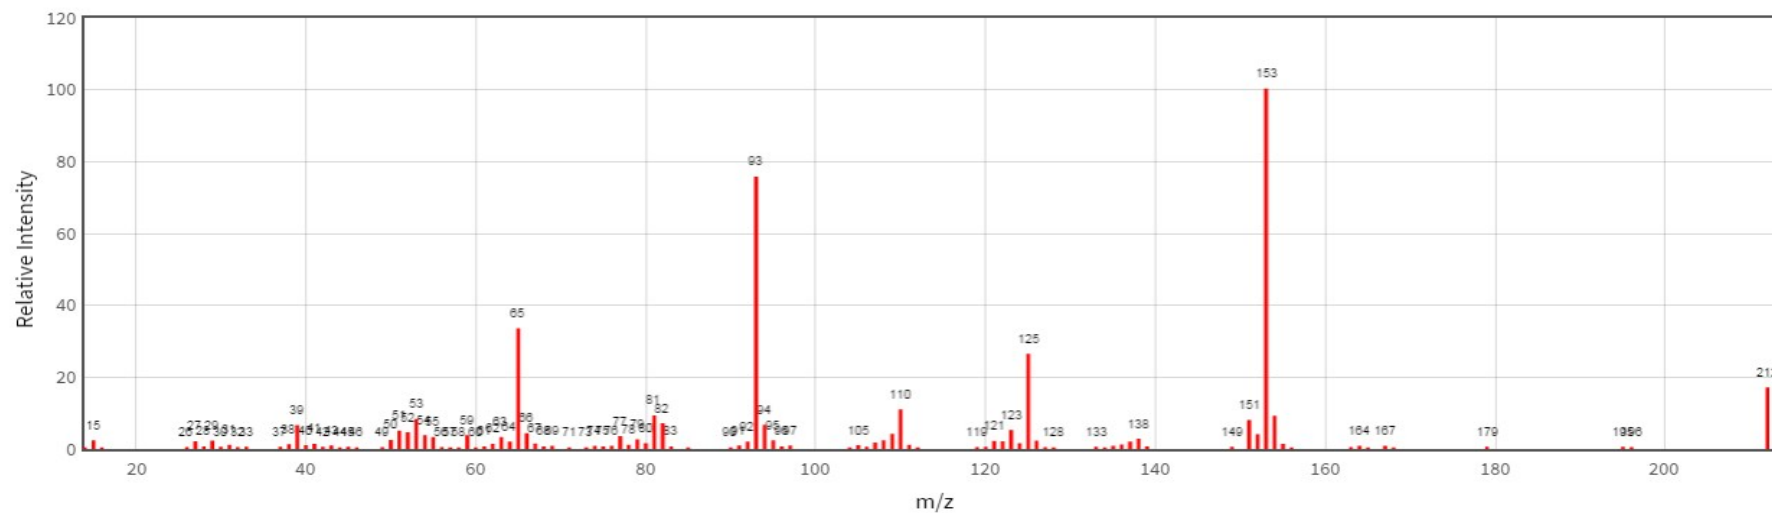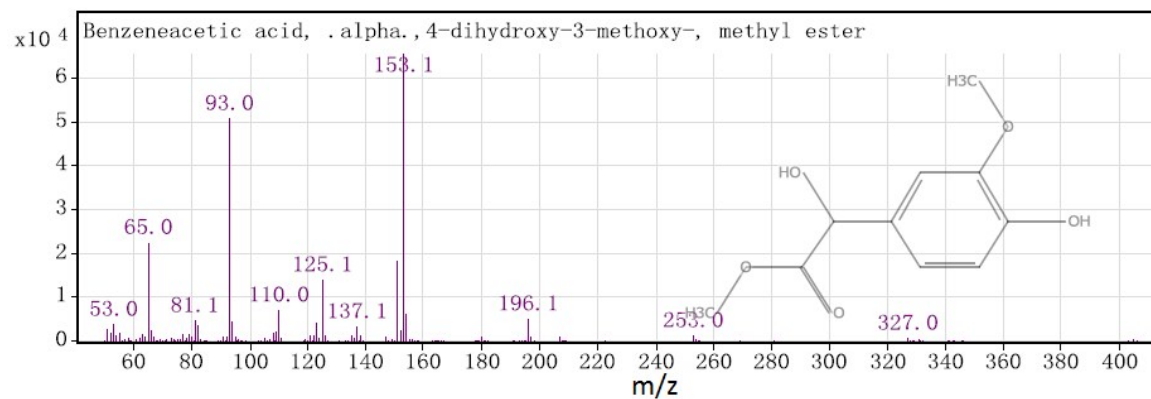

The mass spectrum of Benzeneacetic acid, .alpha.,4-dihydroxy-3-methoxy-, methyl ester (**BDME**) from NIST library (Top) and GC-MS (Bottom)  
Compound CID: 592691  
CAS Registry Number: 2911-74-2

# 2,4'-Dihydroxy-3'-methoxyacetophenone

## Mass Spectrum

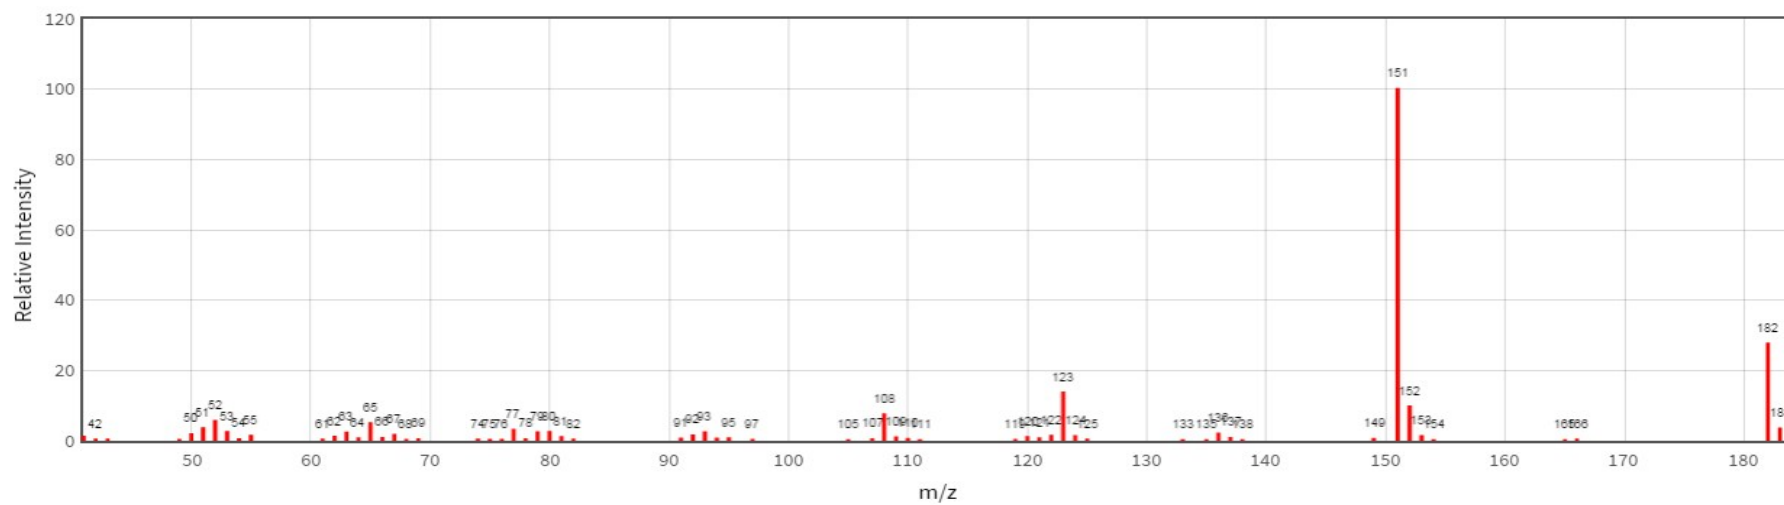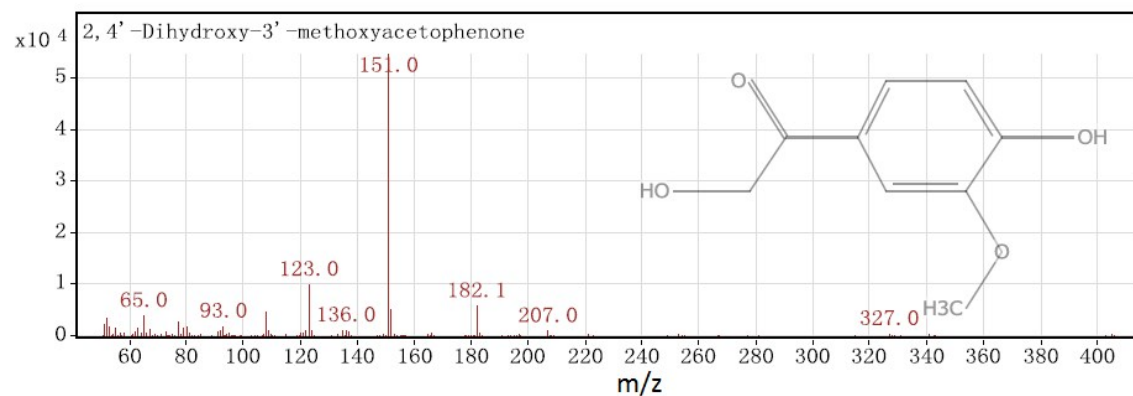

The mass spectrum of 2,4'- Dihydroxy - 3'-methoxyacetophenone (**DMP**) from NIST library (Top) and GC-MS (Bottom)  
Compound CID: 87530  
CAS Registry Number: 18256-48-9

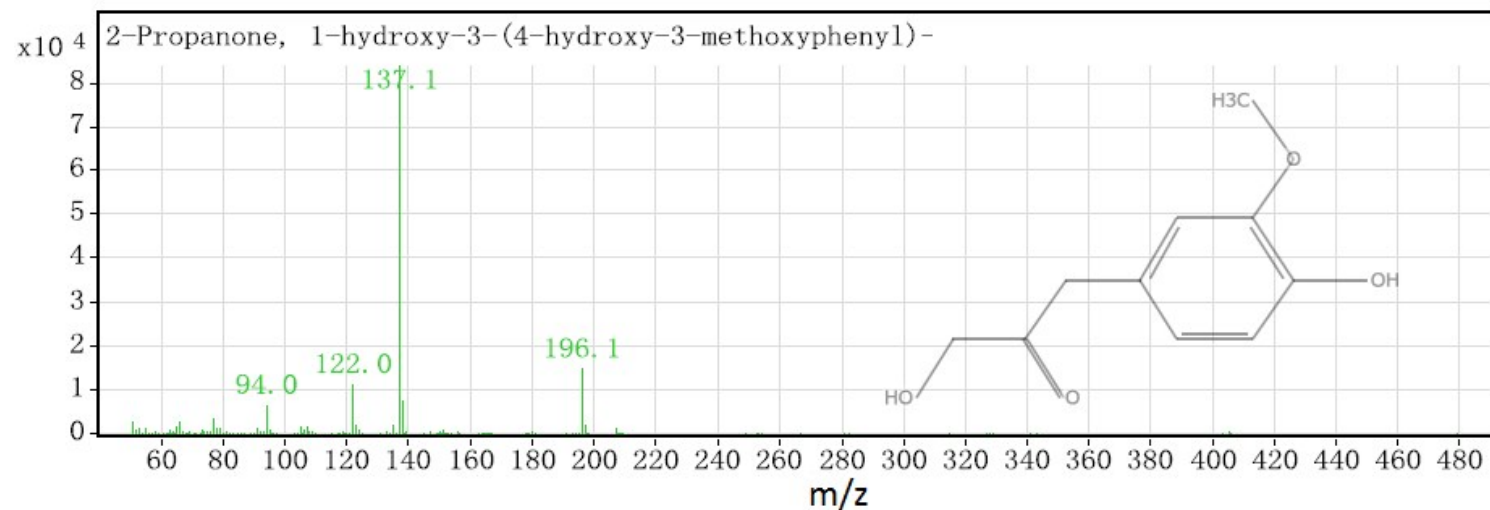

|                 |              |
|-----------------|--------------|
| NIST Number     | 8700         |
| Library         | Main library |
| Total Peaks     | 22           |
| m/z Top Peak    | 137          |
| m/z 2nd Highest | 196          |
| m/z 3rd Highest | 94           |

Thumbnail

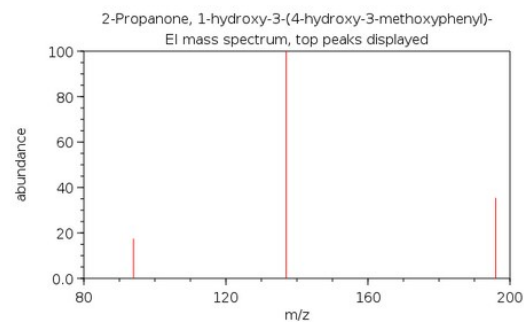

The mass spectrum of 2-Propanone,1-hydroxy-3-(4-hydroxy-3-methoxyphenyl)-**(PHHM)** from GC-MS (Top) and PubChem (Bottom)  
Compound CID: 586459  
CAS Registry Number: 4899-74-5

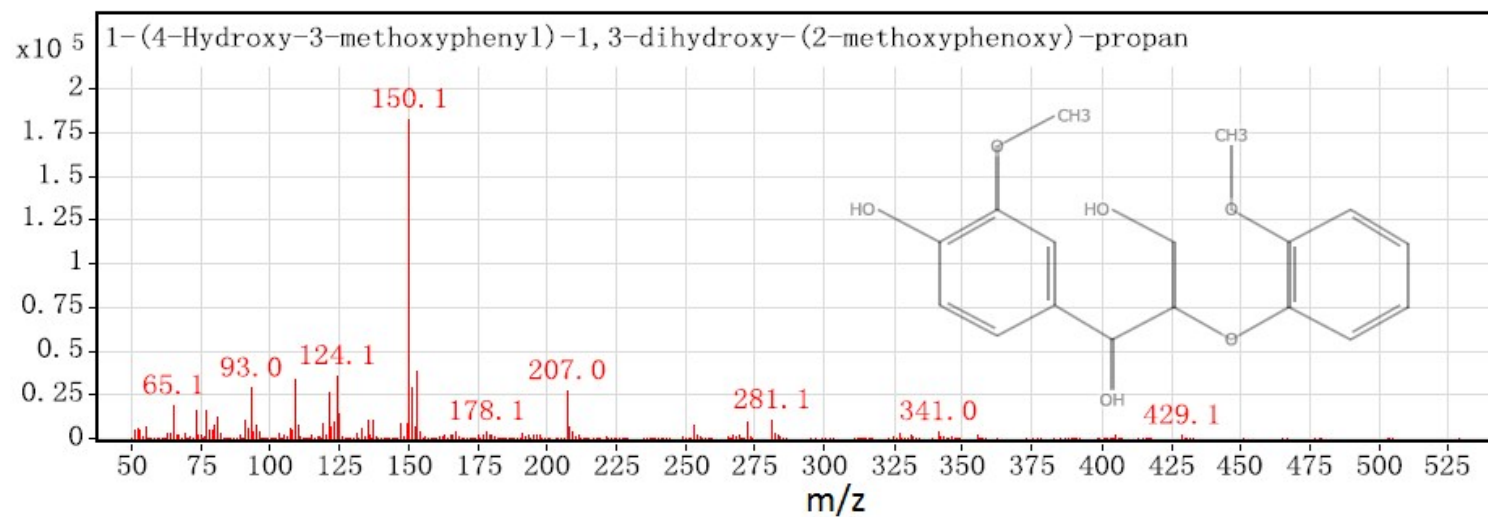

|                 |              |
|-----------------|--------------|
| NIST Number     | 312285       |
| Library         | Main library |
| Total Peaks     | 29           |
| m/z Top Peak    | 150          |
| m/z 2nd Highest | 124          |
| m/z 3rd Highest | 153          |

Thumbnail

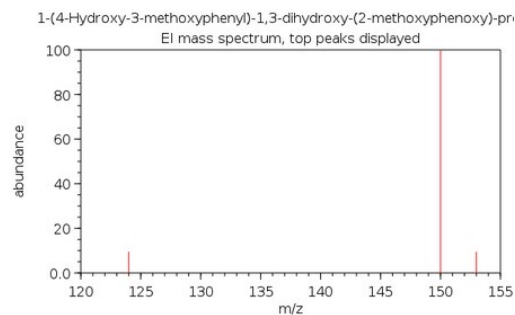

The mass spectrum of 1-(4-Hydroxy-3-methoxyphenyl)-1,3-dihydroxy-(2-methoxyphenoxy)-propan (**GG**) from GC-MS (Top) and PubChem (Bottom)  
Compound CID: 6424189  
CAS Registry Number: 7382-59-4

**Figure S8.** Comparison of mass spectrum between the actually-obtained and the spectroscopy database.

**Mass spectrum of C6C3 enol-ether (EE)( Figure S9)**

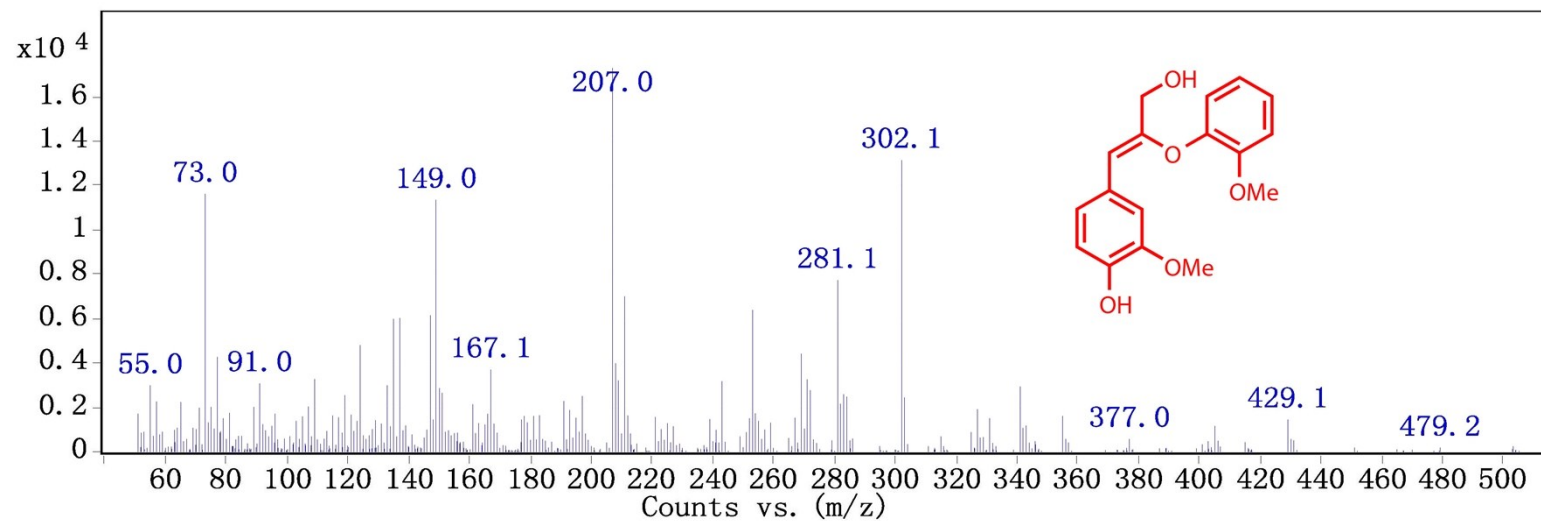

**Figure S9.** Mass spectrum of C6C3 enol-ether (EE), 3-(4-hydroxy-3-methoxyphenyl)-2-(2-methoxyphenoxy)-2-propenol

**Mass spectrum of formylated enol-ether (formylated EE)( Figure S10)**

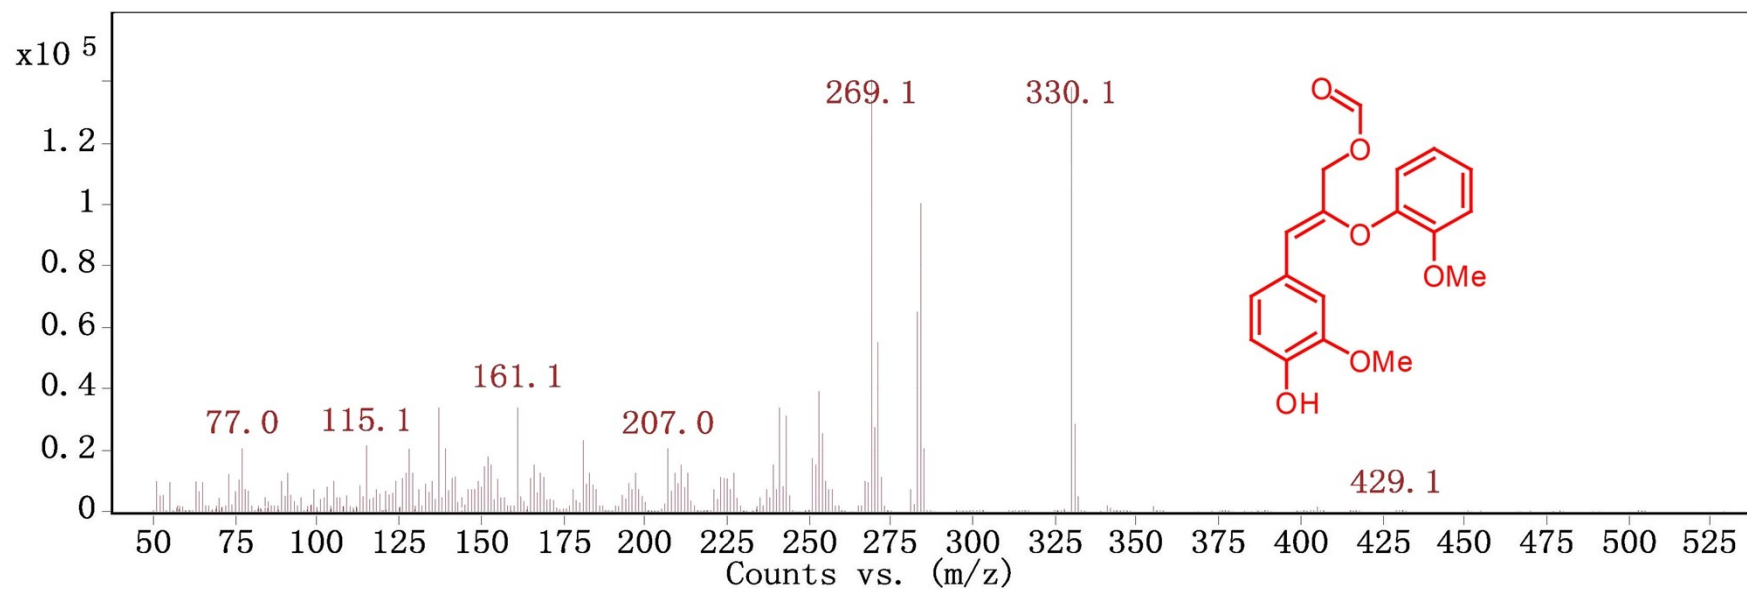

**Figure S10.** Mass spectrum of formylated enol-ether (EE), 3-(4-hydroxy-3-methoxyphenyl)-2-(2-methoxyphenoxy)-2-propenol methyl ester

### Yields of monomeric products from GG degradation(Figure S11)

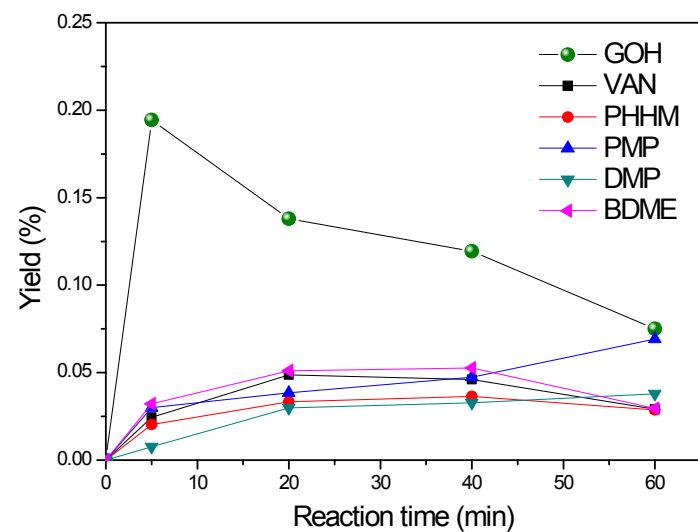

**Figure S11.** Yields of monomeric products from GG degradation, GOH, VAN, PMP were quantified by GC-MS using standards compounds for calibration, while quantification of PHHM, DMP, and BDME were conducted using calibration curve of VAN.

## Assignment of Selected $^{13}\text{C}/^1\text{H}$ Chemical Shifts Observed in HSQC NMR Spectra (Table S1)

**Table S1.** Assignment of selected  $^{13}\text{C}/^1\text{H}$  chemical shifts observed in HSQC NMR Spectra of wheat straw lignin, and quantitative characteristics of MWL of untreated wheat straw, and lignins from RFF fractionation

|                               | $\delta_{\text{C}}/\delta_{\text{H}}$ (ppm) | Assignment                                                                                                    | Relative volume integrals |         |         |         |         |         |        |
|-------------------------------|---------------------------------------------|---------------------------------------------------------------------------------------------------------------|---------------------------|---------|---------|---------|---------|---------|--------|
|                               |                                             |                                                                                                               | F72T120                   | F72T130 | F72T140 | F90T120 | F90T130 | F90T140 | MWL    |
| $\text{B}_{\beta}$            | 53.1/3.43                                   | $\text{C}_{\beta}\text{-H}_{\beta}$ in phenylcoumaran substructures (B)                                       | ND <sup>[a]</sup>         | ND      | ND      | ND      | ND      | ND      | 0.0019 |
| $\text{C}_{\beta}$            | 53.5/3.05                                   | $\text{C}_{\beta}\text{-H}_{\beta}$ in $\beta\text{-}\beta'$ resinol substructures (C)                        | ND                        | ND      | ND      | ND      | ND      | ND      | 0.0001 |
| $\text{-OCH}_3$               | 55.6/3.73                                   | C-H in methoxyls                                                                                              | 1                         | 1       | 1       | 1       | 1       | 1       | 1      |
| $\text{A}_{\gamma}$           | 59.4/3.40 and 3.72                          | $\text{C}_{\gamma}\text{-H}_{\gamma}$ in $\gamma$ -hydroxylated $\beta\text{-O-4'}$ substructures (A)         | 0.08                      | 0.085   | 0.084   | 0.0832  | 0.0914  | 0.0775  | 0.1428 |
| $\text{I}_{\gamma}$           | 61.3/4.08                                   | $\text{C}_{\gamma}\text{-H}_{\gamma}$ in cinnamyl alcohol end-groups (I)                                      | ND                        | ND      | ND      | ND      | ND      | ND      | 0.0056 |
| $\text{B}_{\gamma}$           | 62.6/3.67                                   | $\text{C}_{\gamma}\text{-H}_{\gamma}$ in phenylcoumaran substructures (B)                                     | 0.0546                    | 0.0459  | 0.0487  | 0.0658  | 0.0513  | 0.0361  | 0.0321 |
| $\text{A}'_{\gamma}$          | 63.5/3.83 and 4.30                          | $\text{C}_{\gamma}\text{-H}_{\gamma}$ in $\gamma$ -acylated $\beta\text{-O-4'}$ substructures ( $\text{A}'$ ) | 0.0728                    | 0.1054  | 0.0808  | 0.1061  | 0.1044  | 0.1033  | 0.0132 |
| $\text{A}_{\alpha(\text{G})}$ | 70.9/4.71                                   | $\text{C}_{\alpha}\text{-H}_{\alpha}$ in $\beta\text{-O-4'}$ substructures (A) linked to a G-unit             | 0.0228                    | 0.0272  | 0.0234  | 0.0198  | 0.0189  | 0.0089  | 0.0389 |
| $\text{A}_{\alpha(\text{S})}$ | 71.8/4.83                                   | $\text{C}_{\alpha}\text{-H}_{\alpha}$ in $\beta\text{-O-4'}$ substructures (A) linked to a S-unit             |                           |         |         |         |         |         |        |
| $\text{C}_{\gamma}$           | 71.0/3.81 and 4.17                          | $\text{C}_{\gamma}\text{-H}_{\gamma}$ in $\beta\text{-}\beta'$ resinol substructures (C)                      | 0.0011                    | 0.0013  | 0.0011  | 0.0014  | 0.0011  | ND      | 0.004  |
| $\text{F}_{\alpha}$           | 81.2/5.01                                   | $\text{C}_{\alpha}\text{-H}_{\alpha}$ in spirodienone substructures (F)                                       | ND                        | ND      | ND      | ND      | ND      | ND      | 0.0001 |
| $\text{A}_{\beta(\text{H})}$  | 82.9/4.48                                   | $\text{C}_{\beta}\text{-H}_{\beta}$ in $\beta\text{-O-4'}$ substructures (A) linked to a H-unit               | 0.008                     | 0.0097  | 0.0081  | 0.0057  | 0.0092  | ND      | 0.0053 |
| $\text{A}_{\beta(\text{G})}$  | 83.4/4.27                                   | $\text{C}_{\beta}\text{-H}_{\beta}$ in $\beta\text{-O-4'}$ substructures (A) linked to a G-unit               | ND                        | ND      | ND      | ND      | ND      | ND      | 0.0118 |
| $\text{C}_{\alpha}$           | 84.8/4.65                                   | $\text{C}_{\alpha}\text{-H}_{\alpha}$ in $\beta\text{-}\beta'$ resinol substructures (C)                      | 0.0001                    | 0.0001  | ND      | ND      | ND      | ND      | 0.0001 |
| $\text{A}_{\beta(\text{S})}$  | 85.9/4.10                                   | $\text{C}_{\beta}\text{-H}_{\beta}$ in $\beta\text{-O-4'}$ substructures (A) linked to a S-unit               | 0.0035                    | 0.0011  | 0.0009  | ND      | ND      | ND      | 0.0021 |
| $\text{B}_{\alpha}$           | 86.8/5.43                                   | $\text{C}_{\alpha}\text{-H}_{\alpha}$ in phenylcoumaran substructures (B)                                     | 0.0018                    | 0.0019  | 0.0016  | 0.0015  | 0.0015  | 0.0008  | 0.0033 |
| $\text{T}_8$                  | 94.1/6.56                                   | $\text{C}_8\text{-H}_8$ in triclin (T)                                                                        | ND                        | 0.0007  | ND      | 0.0037  | ND      | ND      | 0.0218 |
| $\text{T}_6$                  | 98.7/6.21                                   | $\text{C}_6\text{-H}_6$ in triclin (T)                                                                        | ND                        | 0.0005  | ND      | 0.0014  | 0.0005  | ND      | 0.0119 |
| $\text{S}_{2,6}$              | 103.8/6.69                                  | $\text{C}_2\text{-H}_2$ and $\text{C}_6\text{-H}_6$ in etherified syringyl units (S)                          | 0.0493                    | 0.066   | 0.0629  | 0.0696  | 0.0655  | 0.0369  | 0.0567 |
| $\text{T}_{2'6'}$             | 103.9/7.29                                  | $\text{C}_{2'}\text{-H}_{2'}$ and $\text{C}_{6'}\text{-H}_{6'}$ in triclin (T)                                | 0.001                     | 0.0035  | 0.0008  | 0.0008  | ND      | ND      | 0.0296 |

|                                         |                     |                                                                                                    |        |        |        |        |        |        |        |
|-----------------------------------------|---------------------|----------------------------------------------------------------------------------------------------|--------|--------|--------|--------|--------|--------|--------|
| T <sub>3</sub>                          | 104.5/7.02          | C <sub>3</sub> -H <sub>3</sub> in triclin (T)                                                      | ND     | 0.0013 | ND     | ND     | ND     | ND     | 0.0257 |
| S' <sub>2,6</sub>                       | 106.3/7.30          | C <sub>2</sub> -H <sub>2</sub> and C <sub>6</sub> -H <sub>6</sub> in α-oxidized syringyl units (S) | ND     | 0.0002 | ND     | ND     | ND     | ND     | 0.0002 |
| FA <sub>2</sub>                         | 110.6/7.26          | C <sub>2</sub> -H <sub>2</sub> in ferulate (FA)                                                    | 0.0011 | 0.0011 | ND     | ND     | ND     | 0.0008 | 0.0012 |
| G <sub>2</sub>                          | 110.9/6.99          | C <sub>2</sub> -H <sub>2</sub> in guaiacyl units (G)                                               | 0.0355 | 0.0414 | 0.0388 | 0.0436 | 0.0402 | 0.0225 | 0.0577 |
| PCA <sub>β</sub><br>and FA <sub>β</sub> | 113.5/6.27          | C <sub>β</sub> -H <sub>β</sub> in p-coumarate (PCA) and ferulate (FA)                              | ND     | ND     | ND     | ND     | ND     | ND     | 0.0008 |
| G <sub>5</sub>                          | 114.9/6.72 and 6.94 | C <sub>5</sub> -H <sub>5</sub> in guaiacyl units (G)                                               | 0.0884 | 0.1007 | 0.0895 | 0.0910 | 0.0905 | 0.0756 | 0.1037 |
| G <sub>6</sub>                          | 118.7/6.77          | C <sub>6</sub> -H <sub>6</sub> in guaiacyl units (G)                                               | 0.0408 | 0.0395 | 0.0281 | 0.0371 | 0.0328 | 0.0185 | 0.0539 |
| PCA <sub>3,5</sub>                      | 115.5/6.77          | C <sub>3</sub> -H <sub>3</sub> and C <sub>5</sub> -H <sub>5</sub> in p-coumarate (PCA)             | ND     | ND     | ND     | ND     | ND     | ND     | 0.0014 |
| H <sub>2,6</sub>                        | 127.8/7.22          | C <sub>2,6</sub> -H <sub>2,6</sub> in p-hydroxyphenyl units (H)                                    | ND     | ND     | ND     | ND     | ND     | ND     | 0.0029 |
| PCA <sub>2,6</sub>                      | 130.1/7.45          | C <sub>2</sub> -H <sub>2</sub> and C <sub>6</sub> -H <sub>6</sub> in p-coumarate (PCA)             | 0.0082 | 0.0085 | 0.0072 | 0.0085 | 0.008  | 0.0033 | 0.0032 |

[a] Not detected.

## Calculation of Various Lignin Moieties by 2D NMR(Table S2)

**Table S2.** Calculation of various lignin moieties by 2D NMR

| Structure                            | Calculation                                                                        |
|--------------------------------------|------------------------------------------------------------------------------------|
| C <sub>9</sub> (total phenylpropane) | $[I(S_{2,6}) + I(S'_{2,6}) + I(S_{\text{condensed}})]/2 + I(G_2) + I(H_{2,6})/2 *$ |
| β-O-4                                | $[I(A_\alpha) + I(A'_\alpha)]/C_9 \times 100$                                      |
| β-5                                  | $I(B_\alpha) / C_9 \times 100$                                                     |
| β-β                                  | $I(C_\alpha) / 2/C_9 \times 100$                                                   |
| Total side ether chains              | $(\beta\text{-O-4}) + (\beta\text{-5}) + (\beta\text{-}\beta)$                     |
| PB                                   | $I(PB_{2,6})/2/ C_9 \times 100$                                                    |
| S                                    | $[I(S_{2,6}) + I(S'_{2,6}) + I(S_{\text{condensed}})]/2 \times 100$                |
| S <sub>condensed</sub>               | $I(S_{\text{condensed}}) / 2 \times 100$                                           |
| G                                    | $I(G_2) \times 100$                                                                |
| H                                    | $I(H_{2,6})/2 \times 100$                                                          |

\**I* is the integration value of corresponding signal in 2D NMR spectra

## Mass balances for RFF treatments of wheat straw and poplar wood (Table S3 and Table S4)

**Table S3.** Mass balances for RFF treatments of wheat straw under a range of processing conditions

| Labels      | Conditions <sup>a</sup> |          |          | Solid fraction <sup>b</sup> |        |       |          |        | Dissolved fraction <sup>b</sup> |       |          |        |
|-------------|-------------------------|----------|----------|-----------------------------|--------|-------|----------|--------|---------------------------------|-------|----------|--------|
|             | <i>F</i>                | <i>T</i> | <i>t</i> | Solid                       | Glucan | Xylan | Arabinan | Lignin | Glucan                          | Xylan | Arabinan | Lignin |
| Wheat straw |                         |          |          | 100                         | 39.45  | 22.74 | 2.57     | 26.49  |                                 |       |          |        |
| F72T120     | 72                      | 120      | 10       | 63.4                        | 38.9   | 7.96  | 0.15     | 10.12  | 0.44                            | 14.83 | 2.25     | 16.29  |
| F72T130     | 72                      | 130      | 10       | 56.5                        | 39.0   | 5.79  | 0.20     | 8.19   | 0.49                            | 18.14 | 2.48     | 19.12  |
| F72T140     | 72                      | 140      | 10       | 53.2                        | 37.4   | 4.41  | 0.04     | 6.75   | 0.51                            | 17.00 | 2.15     | 20.74  |
| F90T120     | 90                      | 120      | 10       | 53.6                        | 33.4   | 4.67  | 0.08     | 7.66   | 0.49                            | 14.57 | 2.34     | 19.94  |
| F90T130     | 90                      | 130      | 10       | 49.5                        | 30.4   | 3.10  | 0.05     | 6.50   | 0.61                            | 17.52 | 2.42     | 21.34  |
| F90T140     | 90                      | 140      | 10       | 45.3                        | 30.8   | 2.21  | 0.04     | 6.58   | 0.71                            | 17.61 | 2.19     | 21.70  |

<sup>a</sup> *F*, concentration of formic acid (wt%); *T*, treatment temperature (°C); *t*, treatment time (min). <sup>b</sup> All data are yields of components (g) per 100 g (oven-dried weight) untreated wheat straw; the standard deviation of determination is  $\pm 2\%$ .

**Table S4.** Mass balances for RFF treatments of poplar wood under a range of processing conditions

| Labels      | Conditions <sup>a</sup> |          |          | Solid fraction <sup>b</sup> |        |       |        | Dissolved fraction <sup>b</sup> |       |        |
|-------------|-------------------------|----------|----------|-----------------------------|--------|-------|--------|---------------------------------|-------|--------|
|             | <i>F</i>                | <i>T</i> | <i>t</i> | Solid                       | Glucan | Xylan | Lignin | Glucan                          | Xylan | Lignin |
| Poplar wood |                         |          |          | 100                         | 41.09  | 17.15 | 25.12  |                                 |       |        |
| F72T120     | 72                      | 120      | 30       | 53.8                        | 38.68  | 2.98  | 5.11   | 0.95                            | 12.21 | 19.21  |
| F72T130     | 72                      | 130      | 30       | 45.9                        | 39.22  | 1.58  | 2.07   | 1.88                            | 15.01 | 22.57  |
| F72T140     | 72                      | 140      | 30       | 43.7                        | 37.82  | 0.99  | 1.27   | 2.38                            | 15.67 | 23.66  |

<sup>a</sup> *F*, concentration of formic acid (wt%); *T*, treatment temperature (°C); *t*, treatment time (min). <sup>b</sup> All data are yields of components (g) per 100 g (oven-dried weight) untreated Poplar wood; the standard deviation of determination is  $\pm 2\%$ .

**Peaks assignment of 2D  $^{13}\text{C}/^1\text{H}$  HSQC NMR of GG degradation products (Table S5)**

**Table S5.** Assignment of 2D  $^{13}\text{C}/^1\text{H}$  HSQC NMR chemical shifts of GG, EE, Formylated-EE, PHHM, CD-I, and CD-II

|                                                                     | $\delta_{\text{C}}/\delta_{\text{H}}$ (ppm) | Assignment                                                                                                 |
|---------------------------------------------------------------------|---------------------------------------------|------------------------------------------------------------------------------------------------------------|
| -OCH <sub>3</sub>                                                   | 55.6/3.84                                   | C-H in methoxyls                                                                                           |
| GG <sub><math>\alpha</math></sub>                                   | 70.91/4.75                                  | C <sub><math>\alpha</math></sub> -H <sub><math>\alpha</math></sub> in GG                                   |
| GG <sub><math>\beta</math></sub>                                    | 83.67/4.27                                  | C <sub><math>\beta</math></sub> -H <sub><math>\beta</math></sub> in GG                                     |
| GG <sub><math>\gamma</math></sub>                                   | 59.83/3.27 and 3.59                         | C <sub><math>\gamma</math></sub> -H <sub><math>\gamma</math></sub> in GG                                   |
| f-GG <sub><math>\alpha</math></sub>                                 | 73.9/6.01                                   | C <sub><math>\alpha</math></sub> -H <sub><math>\alpha</math></sub> in f-GG                                 |
| f-GG <sub><math>\beta</math></sub>                                  | 80.63/4.56                                  | C <sub><math>\beta</math></sub> -H <sub><math>\beta</math></sub> in f-GG                                   |
| f-GG <sub><math>\gamma</math></sub>                                 | 62.81/3.93 and 4.22                         | C <sub><math>\gamma</math></sub> -H <sub><math>\gamma</math></sub> in f-GG                                 |
| f <sub><math>\gamma</math></sub> -EE <sub><math>\alpha</math></sub> | 120.6/6.33                                  | C <sub><math>\alpha</math></sub> -H <sub><math>\alpha</math></sub> in f <sub><math>\gamma</math></sub> -EE |
| f <sub><math>\gamma</math></sub> -EE <sub><math>\gamma</math></sub> | 62.81/3.93 and 4.22                         | C <sub><math>\gamma</math></sub> -H <sub><math>\gamma</math></sub> in f <sub><math>\gamma</math></sub> -EE |
| formyl at C <sub>4</sub>                                            | 161.5/8.29                                  | C-H in formyl at C <sub>4</sub>                                                                            |
| formyl at C <sub><math>\alpha</math></sub>                          | 161.8/8.18                                  | C-H in formyl at C <sub><math>\alpha</math></sub>                                                          |
| formyl at C <sub><math>\gamma</math></sub>                          | 162.5/8.14                                  | C-H in formyl at C <sub><math>\gamma</math></sub>                                                          |
| PHHM <sub><math>\alpha</math></sub>                                 | 44.5/3.67                                   | C <sub><math>\alpha</math></sub> -H <sub><math>\alpha</math></sub> in PHHM                                 |
| PHHM <sub><math>\gamma</math></sub>                                 | 67.1/4.19                                   | C <sub><math>\gamma</math></sub> -H <sub><math>\gamma</math></sub> in PHHM                                 |
| CD-I <sub><math>\alpha</math></sub>                                 | 51.43/4.22                                  | C <sub><math>\alpha</math></sub> -H <sub><math>\alpha</math></sub> in CD-I                                 |
| CD-I <sub><math>\beta</math></sub>                                  | 81.10/4.89                                  | C <sub><math>\beta</math></sub> -H <sub><math>\beta</math></sub> in CD-I                                   |
| CD-I <sub><math>\gamma</math></sub>                                 | 59.53/3.37                                  | C <sub><math>\gamma</math></sub> -H <sub><math>\gamma</math></sub> in CD-I                                 |
| CD-II <sub><math>\alpha</math></sub>                                | 49.26/4.44                                  | C <sub><math>\alpha</math></sub> -H <sub><math>\alpha</math></sub> in CD-II                                |
| CD-II <sub><math>\beta</math></sub>                                 | 91.99/4.54                                  | C <sub><math>\beta</math></sub> -H <sub><math>\beta</math></sub> in CD-II                                  |
| CD-II <sub><math>\gamma</math></sub>                                | 61.63/3.67                                  | C <sub><math>\gamma</math></sub> -H <sub><math>\gamma</math></sub> in CD-II                                |

## Literatures

- [1] Z. Wang, S. Qiu, K. C. Hirth, J. Cheng, J. Wen, N. Li, Y. Fang, X. Pan, J. Zhu, *ACS Sustain. Chem. Eng.* **2019**, 7.
- [2] H. Zhou, L. Tan, Y. Fu, H. Zhang, N. Liu, M. Qin, Z. Wang, *Chemsuschem* **2019**, 12, 1213-1221.
- [3] S. Constant, H. L. Wienk, A. E. Frissen, P. de Peinder, R. Boelens, D. S. Van Es, R. J. Grisel, B. M. Weckhuysen, W. J. Huijgen, R. J. Gosselink, *Green Chem.* **2016**, 18, 2651-2665.
- [4] Y. Zhang, Q. Hou, W. Xu, M. Qin, Y. Fu, Z. Wang, S. Willför, C. Xu, *Ind. Crop. Prod.* **2017**, 108, 864-871.
